1 ***Frequency matters: Up- and Down-Regulation of Dopamine Tone Induces Similar***  
2 ***Frequency Shifts in Cortico-Basal Ganglia Beta Oscillations.***

3

4 L. Iskhakova<sup>1,2,3\*</sup>, P. Rappel<sup>1,2\*</sup>, G. Fonar<sup>1</sup>, O. Marmor<sup>1,2</sup>, R. Paz<sup>3</sup>, Z. Israel<sup>4</sup>, R. Eitan<sup>1,5#</sup>,  
5 H. Bergman<sup>1,2,4#</sup>

6 <sup>1</sup> Department of Medical Neurobiology, Institute of Medical Research Israel–Canada  
7 (IMRIC), The Hebrew University–Hadassah Medical School, Jerusalem, Israel; <sup>2</sup> The  
8 Edmond and Lily Safra Center for Brain Sciences, The Hebrew University, Jerusalem,  
9 Israel; <sup>3</sup> Department of Neurobiology, Weizmann Institute of Science, Rehovot, Israel; <sup>4</sup>  
10 Department of Neurosurgery, Hadassah University Hospital, Jerusalem, Israel; <sup>5</sup>  
11 Jerusalem Mental Health Center, Hebrew University Medical School, Jerusalem, Israel;  
12 Department of Psychiatry, Brigham and Women’s Hospital, Harvard Medical School,  
13 Boston, Massachusetts, USA

14 \* first authors – equal contribution. # last authors – equal contribution

15

16 Corresponding author: L. Iskhakova

17

18 Keywords: dopamine, basal ganglia, beta oscillations, Parkinson’s disease, pallidum,  
19 cortex, coherence, phase-locking, entrainment.

20

21

22

23

24

## 25 **Abstract**

26           Beta oscillatory activity (13-30Hz) is pervasive within the cortico-basal ganglia  
27 (CBG) network. Studies in Parkinson's disease (PD) patients and animal models suggested  
28 that beta-power increases with dopamine depletion. However, the exact relationship  
29 between oscillatory power, frequency and dopamine-tone remains unclear. We recorded  
30 neural activity in the CBG network of non-human-primates (NHP) while acutely up- and  
31 down-modulating dopamine levels. Further, we assessed changes in beta oscillations of PD  
32 patients following acute and chronic changes in dopamine-tone. Beta oscillation frequency  
33 was strongly coupled with dopamine-tone in both NHPs and human patients. In contrast,  
34 power, coherence between single-units and LFP, and spike-LFP phase-locking were not  
35 systematically regulated by dopamine levels. These results demonstrate via causal  
36 manipulations that frequency, rather than other properties, is the key property of  
37 pathological oscillations in the CBG networks. These insights can lead to improvements in  
38 understanding of CBG physiology, PD progression tracking and patient care.

## 39 **Introduction**

40           Oscillatory behavior in different frequency bands is common in the cortico-  
41 subcortical circuits that loop through the basal ganglia (BG). Activity in the beta range (13-  
42 30Hz) has been suggested to play a role in a number of cognitive and motor behaviors.  
43 Beta activity is commonly thought to encode the promotion of a "status quo" by  
44 maintaining an active process that preserves the current motor directive at the cost of  
45 switching to a new one<sup>1</sup>. However, the mechanisms that determine and regulate properties  
46 of beta oscillatory activity, like frequency, power and coherence, are still not well defined.  
47 There is a significant upregulation of the power (amplitude) of beta activity in the BG of  
48 Parkinson's disease (PD) patients<sup>2-4</sup> and PD animal models<sup>5-7</sup>. In line with the "status quo"  
49 hypothesis, PD beta activity has been correlated with akinetic symptoms<sup>8</sup>. Thus, the power  
50 of beta activity in the CBG network has been considered a marker for parkinsonism and  
51 consequently, many researchers, including our group, focused on studying beta activity  
52 amplitude in parkinsonian patients and animal models<sup>5,9</sup>.

53           The neuropathological hallmark of PD is progressive degeneration of midbrain  
54 dopaminergic neurons and their projections to CBG networks. Therefore, a high prevalence  
55 of beta oscillations in PD patients and animal models hinted to a potential role for dopamine

56 in generation of beta oscillations. Acute dopamine modulation in rodent animal models has  
57 not always resulted in changes in beta properties<sup>10,11</sup>. However, in 6-OHDA rodents an  
58 upregulation of dopamine with apomorphine, a dopamine agonist, resulted in an increase  
59 in beta-frequency and a decrease in beta-power<sup>12</sup>. Analysis of PD patients<sup>13</sup> and MPTP  
60 treated NHPs<sup>5,14</sup> revealed a high power beta activity compared to dopamine treated patients  
61 or primate normal controls. In the PD circuitry, the high power of beta activity was  
62 accompanied by an increase in coherence within and between CBG networks<sup>6,10,12,15,16</sup>.  
63 Both were alleviated by dopamine replacement therapy (DRT) or deep brain stimulation  
64 (DBS)<sup>10,12,17-19</sup>. Based on these studies of beta activity in PD patients and animal models,  
65 dopamine has been suggested to play an important role in modulating the power of beta  
66 signaling in the CBG network. However, because most of this evidence was derived from  
67 dopamine-depleted PD patients and animals models we cannot reliably assume that what  
68 we gleaned from these studies provides us with a comprehensive depiction of interactions  
69 between dopamine tone and beta oscillation properties, including power, frequency,  
70 coherence and single-unit entrainment.

71 To examine whether dopamine tone is regulating beta activity we recorded single-  
72 unit activity (SUA) and local field potential (LFP) in the CBG circuit of healthy, awake  
73 behaving non-human primates (NHP) after acute dopamine up- and down-modulation  
74 using apomorphine (dopamine agonist), amphetamine (dopamine transporter (DAT)  
75 inhibitor), and haloperidol (dopamine antagonist). To further examine the effects of acute  
76 and chronic dopamine modulation in human subjects we exploited the data collected from  
77 PD patients before and after dopamine therapy up to 250 days post-surgery using Activa  
78 PC+S (Medtronic Inc., Minneapolis, MN, USA). This allowed us to measure changes in  
79 beta properties as a function of acute dopamine modulation and progressive dopamine loss  
80 that is a hallmark of PD. With a general goal to assemble a comprehensive and nuanced  
81 understanding of beta physiology in the CBG circuitry, our study revealed that beta-  
82 frequency, rather than power or any other property, is the key marker of dopamine tone  
83 and pathological oscillations in the CBG networks. We further propose that progressive  
84 beta-frequency decline, and not a beta-power amplitude, could be used as a more effective  
85 indicator of PD progression and as a trigger for adaptive DBS procedures.

86

87

## 88 **Results**

89 We examined SUA and LFP recordings collected with multiple micro-electrodes  
90 from the dorso-lateral prefrontal cortex (dlPFC) and the external segment of the globus  
91 pallidus (GPe), the central nucleus of the BG circuitry<sup>5</sup>, of awake, behaving monkeys under  
92 acute up- and down-modulation of dopamine tone (Fig.1A-D, Table S1)<sup>20</sup>. Cortical units  
93 were separated into putative-pyramidal cells (wide) and putative-interneurons (narrow)  
94 based on the width of the spike shape (Fig.S1)<sup>21,22</sup>. Our assessment of human  
95 electrophysiology utilized multiple post-surgery recording of bilateral subthalamic nucleus  
96 (STN) LFP from 4 PD patients on and off DRT over a period of 170 to 250 days (Fig.1E-  
97 H, Table S2).

98

### 99 **Up- and down-modulation of dopamine tone up- and down-shifts LFP beta-** 100 **frequency, respectively**

101

102 The population average spectrogram of LFP signal recorded in the dlPFC and GPe  
103 revealed a clear shift in frequency and amplitude of beta oscillations in response to both  
104 up- and down-modulation of dopamine tone (Fig.2A). Beta signal from the GPe exhibited  
105 greater power in comparison to that from the dlPFC. Saline injections resulted in  
106 maintenance of beta oscillation frequency, while acute upregulation of dopamine tone by  
107 amphetamine (DAT blocker) shifted the frequency of beta oscillations up and  
108 downregulation of dopamine tone by haloperidol (dopamine receptor antagonist) shifted  
109 beta-frequency down. Beta shift was maintained for the duration of the recording  
110 (~3hours). Apomorphine (dopamine receptor agonist) injection resulted in two distinct  
111 phases. At first, similar to amphetamine, frequency of beta oscillations shifted up (Apo1),  
112 but about 1 hour after injection beta-frequency depressed to about baseline levels (Apo2).  
113 Diverging from the post-amphetamine effect, beta-power decreased during Apo1, and as  
114 the beta-frequency declined in Apo2, beta-power was reestablished.

115

116 Quantitative analysis of LFP beta oscillation properties (Fig.2B-D, post-hoc results  
117 are in Table S3) confirmed that the dopamine tone can bidirectionally shift the frequency

118 of LFP beta oscillations in both cortex (Fig.2B-C;  $\chi^2(4)=185.13$ ,  $p=5.9e-39$ ,  $\eta^2=0.23$ ) and  
119 GPe (Fig.2B-C;  $\chi^2(4)=228.69$ ,  $p=2.5e-48$ ,  $\eta^2=0.35$ ). Control (saline) beta-frequency at  
120 about 14Hz in both brain areas was flanked on the left/lower frequency band by the  
121 haloperidol injection peak (~12Hz) and on the right/higher frequency by amphetamine and  
122 apomorphine (Apo1) injection peaks (~17Hz). Downward shift of beta-frequency in Apo2  
123 recovered the properties of control beta.

124

125 Effect of dopamine tone modulation on beta-power was less robust and inconsistent  
126 (Fig.2D). Beta-power was measured by two methods, first by the area under curve (AUC)  
127 which estimated the total power within the beta band (8-24Hz) and second, by the  
128 amplitude of the peak. In the dlPFC, up-modulation of dopamine tone by amphetamine or  
129 apomorphine (Apo1) resulted in decreased beta-power relative to control (beta-AUC:  
130  $\chi^2(4)=55.54$ ,  $p=2.5e-11$ ,  $\eta^2=0.09$ ; beta-peak:  $\chi^2(4)=59.36$ ,  $p=3.9e-12$ ,  $\eta^2=0.12$ ).  
131 Haloperidol-induced up-modulation of beta-power was not significantly different from  
132 control in the dlPFC. The effect of dopamine tone up-modulation on beta-power was not  
133 consistent in the GPe (beta-AUC:  $\chi^2(4)=8.98$ ,  $p=0.06$ ,  $\eta^2=0.02$ ; beta-peak:  $\chi^2(4)=30.02$ ,  
134  $p=4.8e-6$ ,  $\eta^2=0.07$ ). Apomorphine (Apo1), but not amphetamine, decreased beta-power  
135 relative to control. Analysis of the highest 20% of beta-peak values in each drug category  
136 showed a significant effect of drug treatment on beta-power within this subsection  
137 ( $\chi^2(4)=72.85$ ,  $p=5.7e-15$ ,  $\eta^2=0.69$ ). In comparison with saline, beta-power was higher post-  
138 amphetamine ( $p=1.6e-4$ , hedge's  $g=-1.92$ ) and haloperidol ( $p=0.002$ , hedge's  $g=-1.45$ ) and  
139 lower post-apomorphine (Apo1) ( $p=0.03$ , hedge's  $g=-1.73$ ), suggesting that in some cases  
140 both up- and down-modulation of dopamine tone can induce increases in beta-power.

141

142 **Up- and down-modulation of dopamine up- and down-shifts beta-frequency of**  
143 **spiking activity, respectively**

144

145 Initial test of single-unit firing rate (FR) confirmed that, as previously reported<sup>9</sup>,  
146 dopamine up-and down-modulation alters the FR of single-units in the CBG (Fig.S2; wide  
147 units:  $\chi^2(4)=31.56$ ,  $p=2.4e-6$ ,  $\eta^2=0.008$ ; pallidal units:  $\chi^2(4)=80.94$ ,  $p=1.1e-16$ ,  $\eta^2=0.05$ ).  
148 Amphetamine increased the FR of cortical wide units relative to control ( $p=2.8e-4$ , hedge's

149  $g=-0.14$ ). FR of cortical narrow units was not significantly modulated by dopamine tone  
150 ( $\chi^2(4)=7.78$ ,  $p=0.1$ ,  $\eta^2=0.02$ ). FR in GPe units increased after amphetamine ( $p=0.023$ ,  
151 hedge's  $g=-0.22$ ) and apomorphine (Apo1;  $p=9.4e-7$ , hedge's  $g=-0.55$ ) injection and  
152 decreased after haloperidol injection relative to control ( $p=6.0e-4$ , hedge's  $g=0.29$ ). Once  
153 the single-unit FRs were confirmed to follow previously established patterns, the SUA was  
154 examined for expression of beta oscillations.

155

156 In agreement with LFP results, acute dopamine tone modulation up/down-shifted  
157 the frequency of beta oscillations in narrow cortical units ( $\chi^2(4)=18.35$ ,  $p=0.001$ ,  $\eta^2=0.06$ )  
158 and pallidal units ( $\chi^2(4)=52.36$ ,  $p=1.2e-10$ ,  $\eta^2=0.02$ ), but not in the wide cortical units  
159 ( $\chi^2(4)=2.35$ ,  $p=0.67$ ,  $\eta^2=0.001$ ) (Fig.3A,B, post-hoc results are in Table S4). Haloperidol-  
160 induced low dopamine tone resulted in a lower frequency of beta oscillations in comparison  
161 to control in both narrow cortical and pallidal units. An increase in dopamine tone post-  
162 amphetamine shifted the frequency of pallidal beta oscillations to a higher frequency range.

163

164 The power of beta oscillations in pallidal units was modulated by dopamine tone  
165 (beta-AUC:  $\chi^2(4)=76.72$ ,  $p=8.6e-16$ ,  $\eta^2=0.05$ ; beta-peak:  $\chi^2(4)=64.29$ ,  $p=3.6e-13$ ,  
166  $\eta^2=0.04$ ), but the relationship between dopamine tone and beta-power was not monotonic.  
167 Apomorphine (Apo1 and Apo2), but not amphetamine, induced a significant decrease in  
168 beta-power compared to control (Fig.3C). Both AUC and beta-peak analyses for  
169 haloperidol and amphetamine showed no statistical difference from control (Fig.3A,C).  
170 However, amphetamine significantly increased the number of oscillatory cortical narrow  
171 ( $\chi^2(4)=11.70$ ,  $p=0.0197$ , Cramér's  $V=0.19$ ) and pallidal ( $\chi^2(4)=38.75$ ,  $p=7.8e-8$ , Cramér's  
172  $V=0.15$ ) units (Fig.S3, post-hoc at Table S5).

173

174 LFP and SUA in saline condition were also compared to that of the naïve animals,  
175 to test for an effect of injection and recording process (Fig.S4,5). In both cortical  
176 ( $t_{(363)}=6.19$ ,  $p=1.6e-9$ , hedge's  $g = 0.71$ ) and pallidal ( $t_{(508)}=4.77$ ,  $p=2.4e-6$ , hedge's  $g =$   
177  $0.42$ ) LFP, beta oscillations in the saline condition had a lower frequency relative to that  
178 of naïve animals. Pallidal units' beta-power was higher in the saline condition (beta-AUC:  
179  $t_{(1551)}=-3.74$ ,  $p=2e-4$ , hedge's  $g=0.21$ ; beta-peak:  $t_{(1551)}=-4.13$ ,  $p=3.8e-05$ , hedge's  $g=0.21$ ).

180 These effects could be explained as an outcome of minimal damage caused by chronic  
181 microelectrode recording and/or a mild dopamine depletion throughout the experiment  
182 period. However, no frequency shift was seen in single-unit oscillations between naïve and  
183 saline conditions.

184

### 185 **Frequency of beta LFP coherence in the dlPFC and GPe is shifted by acute up- and** 186 **down-modulations of dopamine tone**

187

188 Coherence is used to measure synchrony within and between neural populations.  
189 Up- and down-regulation of dopamine tone shifted the central frequency of LFP coherence  
190 in the beta range (Fig.4A-C, post-hoc results are in Table S6) within the dlPFC  
191 ( $\chi^2(4)=281.07$ ,  $p=1.3e-59$ ,  $\eta^2=0.18$ ), GPe ( $\chi^2(4)=399.93$ ,  $p=2.9e-85$ ,  $\eta^2=0.47$ ), and  
192 between the dlPFC and the GPe ( $\chi^2(4)=213.52$ ,  $p=4.6e-45$ ,  $\eta^2=0.37$ ), in the same direction  
193 as for the single site (Fig.2 and 3) beta oscillations. Haloperidol down-shifted the coherence  
194 peak frequency, while apomorphine and amphetamine up-shifted the coherence peak  
195 frequency within the beta range. Interestingly, while cortical LFP coherence within  
196 hemispheres was greater than that between hemispheres, in the GPe, coherence within and  
197 between hemispheres was comparable (Fig.S6). On the single-unit level, pallidal-pallidal  
198 and dlPFC narrow-narrow unit pairs exhibited dopamine tone dependence in coherence  
199 beta-frequency (Fig.S7).

200

201 Up- and down-modulation of dopamine tone perturbed the degree of LFP  
202 synchrony within the beta range between dlPFC-dlPFC (beta-AUC:  $\chi^2(4)=43.64$ ,  $p=7.6e-$   
203  $9$ ,  $\eta^2=0.03$ ; beta-peak:  $\chi^2(4)=75.84$ ,  $p=1.3e-15$ ,  $\eta^2=0.06$ ), GPe-GPe (beta-AUC:  
204  $\chi^2(4)=26.55$ ,  $p=2.4e-5$ ,  $\eta^2=0.05$ ; beta-peak:  $\chi^2(4)=41.09$ ,  $p=2.6e-8$ ,  $\eta^2=0.05$ ), and dlPFC-  
205 GPe (beta-AUC:  $\chi^2(4)=26.63$ ,  $p=2.4e-5$ ,  $\eta^2=0.05$ ; beta-peak:  $\chi^2(4)=27.78$ ,  $p=1.4e-5$ ,  
206  $\eta^2=0.04$ ) sites (Fig.4D, post-hoc results are in Table S6).

207

208 In the dlPFC, LFP beta synchrony increased after dopamine up-modulation by  
209 amphetamine and down-modulation by haloperidol (Fig.4D). In the GPe, LFP beta  
210 coherence was only increased by dopamine up-modulation by amphetamine or

211 apomorphine (Apo1), but not by dopamine down-modulation. LFP beta coherence between  
212 dlPFC and GPe was also increased by dopamine up-modulation by amphetamine and  
213 apomorphine (Apo1) and in the recovery period after apomorphine injection (Apo2).  
214 Importantly, apomorphine first induced a reduction in dlPFC-GPe beta coherence (Fig.4A),  
215 similar to its effect on beta-power (Fig.2). The significant enhancement seen during Apo1  
216 (Fig.4D) is probably due to some overlap between Apo1 and Apo2. Analysis of LFP-LFP  
217 phase-locking value (PLV) revealed a similar shift in the frequency of beta synchronization  
218 (Fig.S8, post-hoc results are in Table S7).

219

### 220 **Acute up- and down-modulation of dopamine tone redirects spike-LFP entrainment** 221 **to opposing beta phases**

222

223 Dopamine modulation changed the number of units entrained to LFP beta  
224 oscillations in cortical wide ( $\chi^2(4)=51.87$ ,  $p=1.5e-10$ , Cramér's  $V=0.18$ ), narrow  
225 ( $\chi^2(4)=10.95$ ,  $p=0.027$ , Cramér's  $V=0.198$ ) and pallidal ( $\chi^2(4)=51.52$ ,  $p=1.7e-10$ , Cramér's  
226  $V=0.19$ ) units (Fig.5A; post-hoc results are in table S8). Up-modulation of dopamine tone  
227 by amphetamine increased the number of entrained wide cortical units, while apomorphine  
228 (Apo2) led to a reduction in entrained units. In the GPe, haloperidol increased the number  
229 of entrained units relative to control, while apomorphine (Apo1) decreased it. Results in  
230 narrow cortical units showed similar pattern to pallidal units, though comparisons did not  
231 yield a significant difference between control and drug conditions.

232

233 The degree of spike-to-LFP entrainment can be assessed by the vector-length of the  
234 spike phase circular average. A large vector-length indicates a high tendency of spikes to  
235 cluster around a specific phase of the LFP oscillation. Modulation of dopamine tone  
236 affected the vector-length in pallidal units (Fig.5B, post-hoc results are in Table S8;  
237  $\chi^2(4)=99.83$ ,  $p=1.1e-20$ ,  $\eta^2=0.04$ ). Down-regulation of dopamine tone by haloperidol  
238 increased the vector-length relative to control. Upregulation of dopamine tone by  
239 apomorphine (Apo1) decreased the vector-length relative to control. During the post-  
240 agonistic period (Apo2) vector-length recovered and exceeded control values.  
241 Amphetamine, however, did not generate a similar effect to apomorphine. In cortical wide



242 units our results indicated a significant effect of dopamine modulation on vector-length  
243 (Fig.5B;  $\chi^2(4)=11.02$ ,  $p=0.026$ ,  $\eta^2=0.009$ ), but post-hoc comparisons failed to reveal a  
244 significant effect of drug treatments, although the difference between saline and  
245 haloperidol approached significance (Table S8;  $p=0.054$ ). In cortical narrow units, the  
246 trend of results was similar to that seen in pallidal units, but with no statistical significance  
247 (Fig.5B).

248

249 Next, we focused on the effect of drug injection on the preferred phase of entrained  
250 units (Fig.5C left, post-hoc results are in Table S8). These results showed that cortical wide  
251 and narrow units maintained their phase-locking to the trough of the beta cycle throughout  
252 all the different acute dopamine modulations. In contrast, in pallidal units, circular median  
253 test revealed a significant modulation of preferred phase by drugs ( $P=33.45$ ,  $p=9.7e-07$ ),  
254 but post-hoc comparisons failed to reveal the origin of this effect (Table S8) probably due  
255 to low statistical power of the statistical test available to use for this data type. A visual  
256 inspection suggested that in the control condition preferred phase distribution is bimodal  
257 with high probability for units to be entrained to either the peak or trough of the LFP beta  
258 cycle. Dopamine down-modulation by haloperidol shifts pallidal preferred phase to the  
259 peak of the beta cycle, while dopamine up-modulation by apomorphine and amphetamine  
260 shifts pallidal preferred phase to the descending phase (Apo1) or trough (amphetamine) of  
261 the beta cycle.

262

263 Given the opposing effect of dopamine up- and down-regulation on beta  
264 oscillations frequency, we decided to further examine the effect of beta-frequency on the  
265 preferred phase of entrained units. For that purpose, we took only units recorded in the  
266 control condition (saline) that were both oscillatory and entrained to the LFP beta cycle  
267 (Fig.S9). Units were segregated into low and high beta-frequency clusters according to  
268 their beta oscillation frequency with the cutoff at 15Hz. In pallidal units, low-frequency  
269 beta oscillations increased the entrainment to LFP beta cycle peak and decreased the  
270 entrainment to LFP beta-trough (Fig.5C middle,  $P=3.88$ ,  $p=0.049$ ). We then repeated this  
271 analysis for all the oscillatory entrained units included in this study, regardless of their drug  
272 condition, with similar results (Fig.5C right,  $P=11.91$ ,  $p=0.0006$ ). We also conducted a

273 similar analysis using the LFP beta-frequency as the grouping factor instead of the unit  
274 beta-frequency. This analysis did not reveal any significant effect when applied on saline  
275 units. However, when applied on the entire cohort it revealed a significant effect for all unit  
276 types. Low-frequency LFP beta oscillations increased the entrainment of units to LFP beta-  
277 peak and decreased the entrainment to LFP beta-trough (wide:  $P=8.48$ ,  $p=0.004$ ; narrow:  
278  $P=13.87$ ,  $p=0.0002$ ; pallidal:  $P=12.51$ ,  $p=0.0004$ ). As expected, in all cell-type categories,  
279 low-beta clusters were heavily occupied by low dopamine haloperidol recordings and high-  
280 beta clusters were mostly composed of high dopamine amphetamine and Apo1 recordings.  
281 Control and Apo2 recordings distributed equally between the two groups.

282

### 283 **In human PD patients, frequency of beta oscillation is modulated by DRT and disease** 284 **progression**

285

286 In humans, beta range is wider than in NHP, and is divided into two bands: low-  
287 beta (13-23Hz) and high-beta (23-35Hz) (Fig.6A). A PD patient can exhibit beta  
288 oscillations in either or both beta ranges, as can be seen in the single-peak or double-peak  
289 shape of the PSD (Fig.6A). In order to account for these differences we constructed a  
290 separate mixed linear effect model (MLEM) for low-beta and high-beta oscillations (Table  
291 S9). We used MLEM to estimate the effects of DRT and time on frequency and power.  
292 Since PD is a progressive neurodegenerative disease, the time factor probably coincides  
293 with the disease-induced chronic degeneration of dopaminergic cells and decrease in  
294 dopamine tone. Therefore and given our NHP results, we hypothesized that in PD patients  
295 we will see a progressive decline in beta-frequency with time. Our dataset is both nested,  
296 i.e. each patient has several recording sites with several observations per site, and  
297 unbalanced, i.e. there are different number of recordings per patient. MLEMs can be used  
298 on nested and unbalanced datasets and also overcome patient-specific variabilities.

299

300 Assessment of beta oscillation frequency over a period of 250 days post-surgery  
301 exposed a consistent decline in frequency of high, but not low, beta oscillations  
302 ( $F(1,462)=33.95$ ,  $p=1.1e-8$ ). This decline was more robust in the off-DRT condition  
303 relative to the on-DRT condition (interaction effect:  $F(1,462)=25.36$ ,  $p=6.8e-7$ ) (Fig.6B).

304 DRT did not significantly affect beta-frequency. However, in the low-beta range DRT-  
305 induced an up-shift in beta-frequency that was close to significance ( $F(1,414)=3.74$ ,  
306  $p=0.054$ ) (Fig.6C). Furthermore, a visual inspection suggested a shift-up of beta-frequency  
307 post DRT in some, but not all, of the patients (see jur01 and jur03 in Fig.S10).

308

309 The effect of dopamine tone modulation by DRT generated similar trends on power  
310 in high and low-beta domains. However, the model indicated that DRT-induced decline in  
311 power was significant only in the low-beta domain ( $F(1,665)=40.93$ ,  $p=2.9e-10$ ) and close  
312 to significance in the high-beta domain ( $F(1,736)=3.35$ ,  $p=0.068$ ). This can also be seen on  
313 the single patient level (Fig.6A, Fig.S11, Table S10). DRT affected the time-induced  
314 changes in low-beta-power (interaction effect:  $F(1,665)=6.39$ ,  $p=0.012$ ) suggesting that  
315 off-DRT beta-power was reduced over time, while on-DRT beta-power was mildly  
316 elevated (Fig.6E).

317

### 318 **Up- and down-modulation of dopamine tone shifts the frequency of beta coherence in** 319 **PD patients**

320

321 In PD patients LFP-LFP coherence frequency was mildly dependent on dopamine  
322 tone (Fig.7A). DRT didn't have a significant effect on the frequency of beta coherence in  
323 either high or low-beta domains (Fig.7B,C, full model results in Table S10). Chronic  
324 dopamine degeneration that induced a slow decline in beta-frequency within the high-beta  
325 domain (Fig.6) also induced a decrease in frequency of high-beta coherence (Fig. 7B,  
326  $F(1,120)=8.06$ ,  $p=0.005$ ), but not low-beta coherence (Fig. 7C;  $F(1,201)=0.55$ ,  $p=0.46$ ).  
327 This can also be seen at a single patient level (Fig.S12). The model did not reveal any  
328 significant medication or time-dependent changes in LFP synchrony (Fig.7D,E). On the  
329 single patient level, the effects of time on synchrony in the high and low-beta domains are  
330 inconsistent between the patients (Fig.S13).

331

### 332 **Discussion**

333

334 Analysis of beta properties in NHP and PD patients showed that the frequency of  
335 beta oscillations and beta coherence strongly correlated with acute and chronic changes in  
336 dopamine tone. In contrast, effects of dopamine tone on beta-power, beta synchrony and  
337 spike/LFP phase-locking are non-monotonic, inconsistent and less robust (Fig.8). These  
338 results emphasize beta-frequency, and not beta-power or any other beta oscillation features,  
339 as the key property of physiological and pathological beta oscillations in CBG networks.

340

341 **Beta-frequency but not beta-power is monotonically correlated with acute changes in**  
342 **dopamine tone in PD patients and NHPs**

343

344 Previous studies in PD patients and animal models have examined the effects of  
345 acute dopamine tone changes by assessing properties of beta oscillations during off and on  
346 DRT. These studies suggested that while STN LFP beta-frequency is not altered by acute  
347 changes in dopamine tone<sup>11,13,23-25</sup>, beta-power is decreased by acute increase in dopamine  
348 tone following treatment with L-Dopa and apomorphine<sup>13,23,25-27</sup>. In our study, acute  
349 dopamine up- and down-modulation in NHP resulted in clear shifts up and down the beta  
350 oscillation frequency domain (Fig. 2-3). Remarkably, beta-power increases could be  
351 generated in the LFP (Fig.2) and SUA (Fig.3) by either acute up- or down-regulation of  
352 dopamine tone. These results suggest that in healthy systems both up- and down-  
353 modulations of dopamine tone have the capability to generate high-power beta signals.  
354 Regarding the opposite effect of dopamine up-modulation by amphetamine and  
355 apomorphine (Fig.2) on beta-power, we can assume that this effect depends on additional  
356 parameters other than purely dopamine tone.

357

358 Both amphetamine and apomorphine increase dopamine neurotransmission tone,  
359 but mechanisms and sites of action are fundamentally different between these two agents.  
360 Amphetamine inhibits DAT function, which leads to increased activity-dependent  
361 dopamine concentration in the synaptic cleft and stimulation of synaptic dopamine  
362 receptors. Previous studies in rodents and humans measuring beta activity after DAT  
363 inhibition, via administration of methylphenidate and cocaine, showed a sharp increase in  
364 beta-power<sup>28,29</sup>. Apomorphine, on the other hand, directly stimulates dopamine receptors,

365 probably with higher affinity for D2 receptors, in an activity-independent manner and  
366 irrespective of their location<sup>30</sup>. Consequently, apomorphine activates not only synaptic and  
367 extra-synaptic receptors in the projection nuclei but also autoreceptors that are activated by  
368 the somatodendritically released dopamine. Once autoreceptors are activated, dopamine  
369 dynamics can be altered via inhibition of the discharge of dopamine neurons, as well as by  
370 reduced dopamine synthesis and release<sup>31-33</sup>. These and other differences between  
371 amphetamine and apomorphine could be behind the variability in dynamics of beta-power  
372 response.

373

374 Our results of LFP beta oscillations in PD patients off/on DRT (Fig.6) are in-line  
375 with previously published reports confirming a significant medication effect on lowering  
376 of beta-power. Here, we have shown that the effect of medication on beta-power is  
377 accompanied by its effect on beta-frequency. Hints of this phenomenon can be found in  
378 previous reports<sup>13,25</sup>.

379

### 380 **Beta-frequency but not beta-power is correlated with chronic changes in dopamine** 381 **tone in PD patients**

382

383 Previous studies of beta properties after chronic dopamine modulation in human  
384 and animal models produced inconsistent results<sup>11,26,34</sup>. In rodents, chronic dopamine  
385 denervation resulted in either no change in frequency or power of beta<sup>26,34</sup>, or a progressive  
386 increase in beta-power but no change in beta-frequency<sup>10</sup>. In primates, beta-frequency was  
387 shown to decline with progressive parkinsonism caused by staggered MPTP  
388 administrations<sup>35,36</sup>. This decrease in beta-frequency was accompanied with an increase in  
389 power. A human study assessing beta-frequency over a 7 year period in post-surgery PD  
390 patients showed no change in beta-frequency and a decrease in beta-power<sup>37</sup>. Our results  
391 showed a consistent and significant time effect post-surgery in high beta-frequency, but  
392 beta-power changes were less consistent (Fig.6B-D, Fig.S10,11). The difference in  
393 methods of data collection could explain the disparity between our results and those  
394 previously published<sup>37</sup>. Our method involved multiple recordings in the off and on states  
395 from each of the 4 patients over a span of 170 to 250 days post-surgery, creating a

396 chronological trajectory for each patient off and on DRT. While dopamine tone was not  
397 directly measured in our patients, persistent dopaminergic degeneration has long been  
398 established in PD. These results further support our hypothesis that progressive beta-  
399 frequency decline, and not a beta-power amplitude, could be used as a more effective  
400 marker for the progression of PD and as a trigger for adaptive DBS procedures

401

402 **Coherence frequency within the beta domain but not degree of synchronization is**  
403 **monotonically correlated to acute and chronic changes in dopamine tone**

404

405 Multiple reports concluded that coherence in the beta range within and between the  
406 CBG networks is elevated in a parkinsonian state<sup>6,10,12,15,17</sup>. However, the effect of acute  
407 dopamine modulation on beta-range coherence is still debated. Dopamine-depleted rodents  
408 showed a decrease in coherence in the beta range after apomorphine administration<sup>12</sup>,  
409 accompanied with an increase in coherence frequency. Conversely, PD patients off and on  
410 DRT showed no change in beta coherence<sup>23</sup>. Here, we showed that acute changes in  
411 dopamine tone in NHPs shifted the frequency of LFP coherence in the beta domain within  
412 and between dlPFC and GPe (Fig.4). These shifts mimicked the shifts in beta-frequency in  
413 the power spectrums of single sites/units (Fig.2 and 3). In PD patients, presumed chronic  
414 dopamine degeneration resulted in consistent decline in coherence frequency within the  
415 high-beta-frequency domain (Fig.7). However, acute changes in dopamine tone did not  
416 significantly affected the degree of synchronization. We suggest that it is not sufficient to  
417 rely on the degree of beta coherence when studying dopamine modulation effect on the  
418 CBG circuit. Attention should be paid to the frequency features of coherence.

419

420 **Phase of spike-LFP entrainment is differentially affected by acute changes in**  
421 **dopamine tone**

422

423 Entrainment of spikes to a specific phase of LFP oscillation is a ubiquitous  
424 phenomenon in neural circuits. Previously published analysis supports the notion of an  
425 increase in single-unit phase-locking to beta LFP with dopamine loss<sup>38</sup>. In the GPe,

426 haloperidol-induced entrainment was higher than in control as evidenced in the number of  
427 entrained units and degree of entrainment. When we further examined the relationship  
428 between beta-frequency and spike phase preference, we found that low-beta-frequency  
429 entrained spikes to the peak of LFP beta oscillation while high-beta-frequency  
430 preferentially locked spikes to the trough of the LFP beta cycle (Fig.7D). This suggests a  
431 relationship between beta-frequency and phase preference, and that in addition to the  
432 frequency of beta oscillation, the preferred phase of spike to LFP locking could also be a  
433 factor in the behavioral outcomes. Previously published reports show that inputs arriving  
434 at the optimally excitable phase of beta cycle of cortical cells lead to responses that are  
435 greater in amplitude and have a shorter latency of motor evoked potentials<sup>39</sup>. Additionally,  
436 this phase-dependence was found to be more robust during low-beta (16-19Hz) as opposed  
437 to high-beta expression<sup>40</sup>.

438

## 439 **Conclusions**

440

441 Dopamine transmission pathologies lie at the root of many neurological and  
442 psychiatric diseases, like PD, depression, schizophrenia, and ADD/ADHD. In dopamine-  
443 depleted PD patients and animal models increase in beta-power has become a hallmark of  
444 the disease. However, high beta-power was also found in the CBG of subjects with no  
445 movement disorders<sup>41,42</sup>. Our study demonstrated that beta-frequency is a more reliable and  
446 accurate marker of acute and chronic up- and-down regulation of dopamine tone. Changes  
447 in beta-frequency were detected after acute modulation in dopamine tone in NHP and  
448 during chronic progression of PD in human subjects. Coherence frequency mimicked shifts  
449 seen in beta-frequency. Whereas previous studies proposed that high beta-power is an  
450 indication of dopamine degeneration, our data showed that increases in beta-power can be  
451 generated via bidirectional shifts in dopamine tone. Finally, acute up- and down-  
452 modulation of dopamine tone can lock spikes to opposite phases of beta LFP. Thus opening  
453 the possibility that the spike preferred phase, along with oscillation frequency, contribute  
454 to the electrophysiology behind the PD akinetic phenotype.

455

456 Further studies that can simultaneously record neuronal activity and detect  
457 extracellular dopamine levels could be useful in elaborating the relationship between  
458 dopamine tone and beta oscillation frequency. To better understand the unique patterns of  
459 oscillatory activity between the normal, hypo- and hyper-dopaminergic states it would be  
460 critical to decipher the relationship between beta oscillations and other frequency bands.  
461 Our study is limited because we did not selectively affect particular dopamine targets in a  
462 precise nucleus within the CBG network, or modulated specific dopaminergic circuits, or  
463 selectively stimulated pre- versus post-synaptic dopaminergic receptors. Future studies  
464 should further investigate the relationship between dopamine tone and beta activity. A  
465 better understanding of this unique physiological phenomenon can improve patient care,  
466 impact the therapeutic potential of aDBS procedures, and can serve as a foundation and a  
467 springboard for further clinically-relevant exploration.

468

## 469 **Star Methods**

### 470 **Contact for Reagent and Resource Sharing**

471 Further information and requests may be directed to and will be fulfilled by the  
472 Lead Contact, Dr. Lily Iskhakova ([iskhakova.liliya@weizmann.ac.il](mailto:iskhakova.liliya@weizmann.ac.il))

473

### 474 **NHP experiment: Experimental Model and Subject Details**

475

476 All experimental protocols were conducted in accordance with the National  
477 Institutes of Health *Guide for the Care and Use of Laboratory Animals* (National Research  
478 Council, 2011) and with the Hebrew University guidelines for the use and care of  
479 laboratory animals in research. The experiments were supervised by the Institutional  
480 Animal Care and Use Committee of the Faculty of Medicine, the Hebrew University. The  
481 Hebrew University is an Association for Assessment and Accreditation of Laboratory  
482 Animal Care internationally accredited institute.

483

484 Data was collected from two healthy, young-adult, female vervet monkeys  
485 (*Chlorocebus aethiops sabaesus*; G (MD-13-13518-4) and D (MD-15-14412-5)) weighing  
486 ~4 kg. Monkeys were obtained from the St. Kitts Monkey Farm. The age of monkeys at



487 the time of the experiment was 5-8 years (G: 7-8, D: 5-6). Each monkey was trained in the  
488 task ~3 months prior to the implantation surgery and recording. After completion of  
489 recordings the chambers were removed. Once the monkeys recovered, they were both  
490 transferred to the Ben Shemen Israeli Primate Sanctuary ([www.ipsf.org.il/](http://www.ipsf.org.il/)).

491

## 492 **Surgery and Post-Operative Maintenance**

493

494 Recording chamber implantation took place after the monkeys were fully trained in  
495 the task (~ 3 months, 5-6 days a week, 500-1500 trials per day). An MRI-compatible Cilux  
496 head holder (Crist Instruments, MD) and a rectangular 34x27 mm (inner edge) Cilux  
497 recording chamber (AlphaOmega Engineering, Israel) were implanted above a burr hole in  
498 the skull under deep anesthesia in aseptic conditions as described previously<sup>5</sup>. The head  
499 holder and the chamber were attached to the skull using titanium screws (Crist Instruments,  
500 MD) and wires (Fort Wayne metals, IN) embedded in acrylic cement. The central and  
501 arcuate sulci of both left and right lobes were within the limits of the chamber, which  
502 provided bilateral access to the dlPFC and GPe (Fig.1A,B). Finally, two titanium ground  
503 screws (Crist Instruments, MD) were placed in contact with the dura mater and connected  
504 to the chamber and head holder using a titanium wire.

505

506 Recordings began after a postoperative recovery period of 7 to 10 days, during  
507 which an anatomical MRI scan was performed<sup>5</sup> to estimate the chamber coordinates of the  
508 neuronal targets. Throughout the entire course of the experiments, the chamber was washed  
509 with saline solution every 24-48 hours. After the completion of the recordings an MRI scan  
510 was performed to confirm the location of the recording sites and to rule out significant  
511 brain shifts.

512

## 513 **Task and behavior monitoring**

514

515 NHP subjects were engaged in a behavioral task. The analysis of task behavior-  
516 related electrophysiology is out of the scope of the current publication. Briefly, a reversal-  
517 learning task included multiple blocks with trials consisting visual cues predicting

518 outcomes of different valences. Task included five types of outcomes: palatable and less-  
519 palatable food, air puff to the eyes or nose, and neutral outcome (no food or air puff  
520 delivered). Predictive cues were shuffled between blocks, so the animals had to learn the  
521 new cue-outcome mapping at each block. Anticipatory and event-related behavior was  
522 recorded via laser lick sensors (Sick Sensor Intelligence) and eye-tracking device (ISCAN  
523 Incorporated).

524

### 525 **Acute Dopamine Modulation**

526 All injections were made during the last trial of the first block (20-25 minutes after  
527 the beginning of the recording, Fig.1C). Saline (0.1cc), haloperidol (1 mg/kg) and  
528 amphetamine (0.5 mg/kg) were injected intramuscularly (IM) and apomorphine (0.5  
529 mg/kg) was injected subcutaneously (SubQ). All injections were performed in accordance  
530 with the manufacturer instructions. For analysis purposes, drug influence time was  
531 considered to begin five minutes after drug injection and lasts until the end of the task (>3  
532 hours). Apomorphine has a fast dynamic. Its initial effect lasts for ~1 hour and then activity  
533 returns to baseline. Therefore, we divided post-apomorphine recordings into two phases,  
534 agonistic phase 5-60 minutes after the injection (Apo1) followed by a post-agonistic phase  
535 that lasted until the end of the task (Apo2).

536

### 537 ***In vivo* electrophysiology**

538

539 During the recording sessions, the monkeys' heads were immobilized with a head-  
540 holder. Local field potentials (LFPs) and single-unit spikes were simultaneously recorded  
541 (Fig.1D) from eight glass-coated tungsten electrodes (impedance 0.45-0.8 M $\Omega$  measured  
542 at 1000Hz). Electrodes were arranged in two towers with four electrodes per tower. Each  
543 tower was localized to allow targeting and recording from three configurations: bilateral  
544 GPe or dIPFC, and unilateral (left or right) GPe/dIPFC. Electrodes were navigated within  
545 the brain using the Electrode Positioning System (AlphaOmega Engineering, Israel).

546

547 The electrical activity was amplified by 5000, high-pass filtered at 1Hz using a  
548 hardware two-pole Butterworth filter and low-pass filtered at 10 kHz using a hardware

549 three-pole Butterworth filter. Raw data was sampled at 44 kHz by a 16-bit ( $\pm 1.25V$  input  
550 range) Analog/Digital (A/D) converter. LFP was low pass filtered at 200 Hz and sampled  
551 at 1375Hz. (AlphaLab SnR Stimulation and Recording System, AlphaOmega Engineering,  
552 Israel)

553

554 Spiking activity was sorted online using a template matching algorithm. Up to four  
555 different units could be simultaneously isolated from the same electrode. Off-line, the  
556 isolation quality of each unit was graded by calculating its isolation score<sup>43</sup>. The isolation  
557 score ranged from 0 (i.e., multi-unit activity) to 1 (i.e., perfect isolation). Only units that  
558 were recorded for over one minute and had isolation score  $\geq 0.7$  were included in the  
559 database. Description of the full dataset can be found in Table S1.

560

### 561 **Unit type identification**

562 GPe units were identified as either high frequency discharge (HFD) neurons or low-  
563 frequency discharge (LFD) neurons based on their firing rate and pattern of activity<sup>44</sup>. Units  
564 with firing rate above 30 Hz were classified as HFD. Units with firing rate below 30 Hz  
565 were manually identified as either HFD's or LFD based on absence or presence of bursts,  
566 respectively.

567

568 Cortical units were separated into putative-pyramidal cells and putative-  
569 interneurons based on the width of the spike shape<sup>22,45</sup>. The separation criteria was  
570 determined according to spike width distribution (Fig.S1). Units with spike width larger  
571 than 3 SD over the mean were excluded from further analysis.

572

### 573 **Spectral analysis**

574

575 *Power spectrum density (PSD)*: Power spectrum density (PSD) of LFPs and single-  
576 units was calculated using the welch method. For LFPs, the signal was first cleaned of  
577 high-amplitude artifacts, defined as deviation of over 5 SD from the signal mean. Once  
578 such deviation was detected, the surrounding points were also included in the artifact until

579 the LFP resumed value within 3 SD from the mean. Artifacts were replaced with zeros,  
580 which do not influence spectral analysis results. The clean LFP was parsed into one-minute  
581 segments with 54 second overlap. For each time (see above).

582

583 *Identification of oscillatory signals:* To classify either LFP sites or single-units as  
584 oscillatory, we examined their nPSDs and looked for a peak in the beta range (8-24 Hz).  
585 We required that the prominence of the beta-peak (a measurement of peak size relative to  
586 its surrounding) would be sufficiently larger than the noise-level peak-prominence of the  
587 nPSD. Noise level was estimated as the median of the peak-to-trough distance in the nPSD.  
588 A beta-peak that was two times larger than the noise level was considered sufficiently large,  
589 and the LFP/ single-unit was classified as oscillatory (Fig.S3,14, Table S5). Effect of drug  
590 injection on percentage of oscillatory sites/units in the post-drug conditions was tested  
591 using chi-square test followed by post-hoc comparison with Bonferroni correction for  
592 multiple comparisons (Fig.S3,14, Table S5).

593

594 *Beta oscillation properties:* Total beta-power was estimated in two ways: (1) As  
595 the nPSD's area under curve (AUC) in the beta range, (2) as the peak value in the beta  
596 range. These methods were selected to overcome each other shortcomings. The peak value  
597 is a direct estimation of beta power in its most prominent frequency, but it is affected by  
598 the typical 1/f shape of the nPSD. i.e. peak values in lower frequencies tend to be larger.  
599 The AUC measures the total power in the beta band and therefore it is a more general  
600 estimation that is less affected by the location of the peak. If no significant peak was found  
601 (i.e. non-oscillatory LFP/unit, see above), mean nPSD value in the beta range was utilized  
602 instead. Mean nPSD value was preferred to maximum value because the later tends to  
603 detect power at the edges of the beta band and reflects the nPSD shape rather than the beta-  
604 power per se. For oscillatory signals we also extracted the beta band peak frequency. If  
605 more than one peak was found within the beta range, the peak with the highest prominence  
606 was chosen for the beta peak and frequency analysis. Signals with beta-AUC larger than 5  
607 SD above the mean were defined as outliers and excluded from further analysis. To test for  
608 significant effect of dopamine modulation on beta properties (beta AUC, peak and  
609 frequency) we preformed Kruskal-Wallis test, followed by post-hoc Tukey test. Here and

610 in other analyses below Kruskal-Wallis test was chosen as a non-parametric alternative for  
611 ANOVA since our data failed to fulfill the test assumptions. Analysis was conducted with  
612 matlab built-in functions. In the Tukey post-hoc test, matlab function (multcompare) did  
613 not deliver p values smaller than  $10^{-10}$  due to parameters involving the estimation of the  
614 studentized range cumulative distribution function (CDF). We chose to use the built-in  
615 parameters since their accuracy is more than enough for statistical inference. Beta  
616 properties of LFP and single-units in the saline condition were also compared to that of the  
617 naïve animals using independent two-sample t-test, to test for a possible effect of the  
618 injection and recording procedure.

619

620 *Coherence and phase-locking value:* For each simultaneously recorded LFP signals  
621 or single-units, traces were segmented into one minute segments with 30 seconds overlap,  
622 and magnitude-squared coherence was calculated for each segment using the Welch's  
623 overlapped averaged periodogram method with 5 seconds window, 2.5 second overlap, and  
624 frequency resolution of 1/3 Hz in 1-200 Hz range.

625

626 Since coherence between two signals is affected by both oscillation amplitude and  
627 phase synchrony<sup>46,47</sup>, we further calculated the phase-locking value (PLV)<sup>46</sup> between each  
628 pair of signals to directly measure the later. PLV was calculated after similar segmentation  
629 in the time domain as coherence, and with 1 Hz resolution in the range of 1-80 Hz.

630

631 *Identification of synchronized pairs:* Synchronized pairs were defined using a  
632 similar method to that described above for oscillatory LFPs or single-units. Briefly, we  
633 required that the beta-peak prominence in the coherence function have signal to noise ratio  
634 (SNR) of 2 or above.

635

636 *Beta coherence and phase-locking value (PLV) properties:* As for LFP and single-  
637 unit nPSD beta properties, we assessed beta synchronization in two ways: (1) as the  
638 coherence AUC in the beta range, and (2) as the peak value in beta range or mean value if  
639 no significantly large peak was found. For synchronized pairs we also extracted the  
640 coherence beta-peak frequency. We repeated the same analysis for PLV. To test for

641 significant effect of dopamine modulation on beta properties we preformed Kruskal-Wallis  
642 test, followed by post-hoc Tukey test.

643

644 *Spike-to-LFP entrainment:* If an LFP site was classified as oscillatory, we further  
645 analyzed the entrainment of the spike discharge of local units to the LFP oscillations. LFP  
646 was band-pass filtered around its central beta-frequency (defined above)  $\pm 2$  Hz using a  
647 four-pole Butterworth filter, and beta phase was extracted using Hilbert transformation.  
648 For each unit, beta phase at the time of each spike was extracted. The degree of unit-to-  
649 LFP entrainment can be measured by the vector-length of the circular average of spike  
650 phases. Vector length values range from 0 to 1. A large vector-length indicates a high  
651 tendency of spikes to be clustered around a specific phase of the LFP oscillations. To  
652 evaluate dopamine modulation effect on vector-length we preformed Kruskal-Wallis test,  
653 followed by post-hoc Tukey test. We further evaluated dopamine modulation effect on  
654 entrained unit preferred phase. To classify units as entrained we preformed Rayleigh test  
655 for each unit followed by FDR correction for multiple comparison and used a conservative  
656 threshold of p value = 0.0001. This threshold was chosen to minimize the effect of false  
657 detection on our results. Still the entrainment analysis was more sensitive than the  
658 oscillation analysis described above (see Fig.S9). The preferred phase of an entrained unit  
659 was defined as the circular mean of its spike-phase distribution. Dopamine modulation  
660 effect on phase preference was assessed by circular median test followed by post-hoc  
661 pairwise comparison with Bonferroni correction for multiple comparisons. The circular  
662 median test was chosen over the common Watson-Williams since our data did not fulfill  
663 the latter requirements.

664

665 We further divided the oscillatory entrained units (see Fig.S9A, second column)  
666 into low-beta and high-beta groups according to the unit central beta-frequency (below and  
667 above 15 Hz, respectively). We repeated the statistical test to assess the effect of the unit  
668 beta-frequency on entrained units' preferred phase, for units in the saline condition and for  
669 all units regardless of their drug condition. We also repeated the same analysis for all  
670 entrained units with LFP beta-frequency as the grouping factor instead of unit beta-  
671 frequency.

672

## 673 **Human Data**

674           Methods for human data collection and analysis were thoroughly described in our  
675 previous publication<sup>41</sup>.

676

## 677 **Patient selection**

678

679           In this study, four PD patients underwent STN DBS surgery with implantation of  
680 the Activa PC+S pacemaker (Medtronic, Inc, Minneapolis, MN, USA). All patients met  
681 accepted inclusion criteria for DBS surgery and signed informed consent. Patients had (i)  
682 advanced idiopathic PD; (ii) long-term levodopa use with reduced efficacy, on-off motor  
683 fluctuations and increased incidence of medication-induced side effects; (iii) normal  
684 cognitive function or mild-moderate cognitive decline as defined by Addenbrooke's  
685 cognitive examination (ACE) >75 and frontal assessment battery (FAB) >10. Patients'  
686 levodopa equivalent dose (LED) was calculated according to Tomilson et al<sup>48</sup>. Patient  
687 demographic and clinical information is detailed in Table S10. The study was authorized  
688 and supervised by the IRB of Hadassah Medical Center (no. 0403-13-HMO) and the Israel  
689 Ministry of Health (no. HT6752). Clinical Trials Registration number: NCT01962194.

690

## 691 **Intra-Operative Procedure**

692

693           The surgical technique is described elsewhere<sup>41,49,50</sup>. Briefly, STN target  
694 coordinates were chosen using Framelink 5 or Cranial software (Medtronic, Minneapolis,  
695 USA). STN entry and exit were verified intraoperatively by microelectrode recording of  
696 multi-unit spiking activity along the trajectory. The final localization of the permanent DBS  
697 electrode was determined according to (1) analysis of spontaneous spiking activity, (2)  
698 response of spiking activity to passive and active movements and (3) clinical effects of  
699 stimulation at the target. In one of our patients (jur05), one contact was malfunctioning,  
700 and data from this contact were excluded from the analysis.

701

702 The permanent lead implanted during the surgery (model 3389; Medtronic, Inc.,  
703 Minneapolis, MN) had four contacts. Each contact had a diameter of 1.27 mm and length  
704 of 1.5 mm spaced by 0.5 mm intervals. The lead was placed along the  
705 dorsal/lateral/anterior-ventral/medial/posterior axis of the STN (Fig.1E), and contacts were  
706 numbered from 0 (ventral) to 3 (dorsal). Generally, contact 1 was placed dorsally to the  
707 border between the motor dorsal beta-oscillatory region and the non-motor ventral non-  
708 oscillatory region, detected automatically by a hidden Markov model (HMM)<sup>49</sup> (Fig.1F).

709

### 710 **Post-operative clinical assessment and electrophysiological recordings**

711

712 Patients underwent recordings during 170-400 post-operative days. Recordings  
713 from the first week post-surgery were excluded from the dataset to avoid insertion effect.  
714 Only recordings from the first 250 days were included in the analysis because recordings  
715 after 250<sup>th</sup> day all came from a single patient (jur01, Fig.S10-13). Post-operative recordings  
716 were acquired in an outpatient setting. Patients had clinical evaluations and recording  
717 sessions every 2–4 weeks. During recordings, patients were instructed to sit quietly for the  
718 rest-state session, which lasted three minutes. In addition, sessions included recordings  
719 during performance of four tasks, which are out of the current paper scope (Provocative  
720 Images task, Doubt task, Auditory Go-NoGo task, Emotional Voice Recognition task as  
721 described by Rappel et. al.<sup>41</sup>).

722

723 Recordings took place during an off-medication and on-medication states (Fig.1G,H, see  
724 Table S2 for number of recording days and sessions). Off-medication recordings took place  
725 after overnight withdrawal of DRT. On-medication recordings took place after  
726 confirmation of a substantial improvement in the parkinsonian motor clinical symptoms by  
727 the patient and the examiner.

728

729 LFP activity was recorded from all the bipolar contact pair combinations (0-1,0-  
730 2,0-3,1-2 ,1-3, 2-3) in both hemispheres through the Medtronic PC+S recording setting.  
731 Each contact pair recording lasted 30 seconds. The signal was amplified by 2000, band-



732 passed from 0.5 to 100 Hz, using a 3 pole Butterworth filter, and sampled at 422 Hz by a  
733 10-bit A/D converter (using  $\pm 2V$  input range).

734

### 735 **Spectral analysis**

736

737 *Signal preprocessing:* LFP signal was filtered between 0.5 and 200 Hz using four-  
738 pole butterworth IIR filter. We observed three types of noise artifacts in our data: ECG  
739 artifact, transient high noise artifacts, and line noise artifact. First, we removed ECG  
740 artifacts related to the Aactiva PC+S device. As seen in our data<sup>41</sup> and reported by Swann  
741 et al<sup>16</sup>, bipolar recordings from the most ventro-medial electrode contact (Contact 0,  
742 Fig.1F) were accompanied by electrocardiogram (ECG) artifact in three out of our four  
743 patients. This artifact probably originates from current leakage into the Aactiva PC+S at the  
744 insertion site of the device lead extender over the pectoralis muscle<sup>16</sup>. ECG pulses were  
745 identified by their high peak (above 1.2 SD over the mean) and regularity (coefficient of  
746 variation (CV) < 0.32). The ECG signal recorded from the bipolar contacts 0-1, 0-2, 0-3  
747 was averaged to create a template for each bipolar recording for each visit. This template  
748 was subtracted from every occurrence of the ECG artifact using linear regression to achieve  
749 optimal fit with the data<sup>41</sup>. Second, we removed transient high noise artifacts from the data.  
750 Transient high noise artifacts were identified according to their large absolute amplitude  
751 (>5 SD over the mean). Noise start and end points were defined as return of the absolute  
752 amplitude to  $\leq 3$  SD distance from the mean. Line noise artifact was removed directly from  
753 the PSD (see below).

754

755 *Spectral analysis:* PSD was calculated using the welch method with 500  
756 millisecond windows, 100 millisecond overlap, and frequency resolution of 1/2 Hz. PSD  
757 was divided by the total power to get the normalized PSD (nPSD). The total power was  
758 calculated as PSD sum across frequencies, excluding the PSD portion that was influenced  
759 by line noise artifact (46-57 Hz). The wide range of omitted frequencies was selected to  
760 minimize the effect of line noise artifact on the results of beta oscillation properties  
761 analysis.

762

763           *Beta oscillation properties:* In the analysis of PD patients' LFP beta properties we  
764 took a similar approach as described above for the NHP LFP data. However, there are some  
765 differences between human and NHP characteristic beta oscillations. Human beta range  
766 spans higher frequencies, and it is common to find beta oscillations in two separate beta  
767 ranges, low (13-23 Hz) and high (23-35 Hz), in some but not all patients. Therefore, we  
768 defined active beta range (low-beta, high-beta or both) manually for each patient according  
769 to their mean nPSD. In patient jur03 there was only low-beta activity but its frequency  
770 range was exceptionally wide, so for this patient low-beta range was set to 13-25 Hz.

771

772           For each observation (recording from a single bipolar pair at a single session) we  
773 calculated beta power and frequency. Beta-power was defined as the nPSD's AUC in the  
774 beta range. To overcome patient variability in baseline power estimation we performed  
775 baseline correction. Beta power in the first recording day at each bipolar pair was  
776 subtracted from all consecutive beta power values of the same bipolar pair. Beta-frequency  
777 was defined as peak value frequency, if a significant peak was found. Significant peaks  
778 were defined relative to other peaks in the same nPSD. We considered a beta peak to be  
779 significant if its prominence z-score was equal to or greater than 0.67, equivalent to 75<sup>th</sup>  
780 percentile in a standard normal distribution.

781

782           To assess the contribution of dopamine replacement therapy (DRT) and disease  
783 progress to beta power and frequency we constructed a linear mixed effect model (MLEM).  
784 The model included fixed effects of DRT (on/off) and time from surgery and for the  
785 interaction between the DRT and time factors. The model also included random terms for  
786 intercept, DRT and time effects for each patient and each bipolar pair in each hemisphere.  
787 We constructed a separate model for beta frequency in low-beta and high-beta range, which  
788 included only significant peaks. We also constructed models for beta power in low and  
789 high beta range, which included all recordings.

790

791           *Beta coherence properties:* Magnitude-squared coherence was calculated for each  
792 segment using the Welch's overlapped averaged periodogram method with 250  
793 milliseconds window, 125 milliseconds overlap, and frequency resolution of 1/10 Hz in 1-

794 100 Hz range. Beta analysis was similar to that described above for PSD. Again, beta  
795 ranges were manually assigned to each patient according to their average coherence.

796

### 797 **Data and Software Availability**

798 Data analyses were performed with custom written scripts in MATLAB  
799 (Mathworks, Natick, MA). Requests for data and MATLAB scripts used in the present  
800 study can be directed to the lead author ([liliyai@ekmd.huji.ac.il](mailto:liliyai@ekmd.huji.ac.il)). Data will be posted on  
801 the lab website and made available upon request.

802

### 803 **Acknowledgments**

804 We thank Dr. Uri Werner-Reiss for assistance with training and care of monkeys.  
805 Anatoly Shapochnikov for help designing and building our hardware and set-up. The  
806 veterinary department at Hadassah Medical Center for health maintenance of our primates.  
807 The work was supported by the grants from the Teva: National Network of Excellence  
808 (L.I.), Israeli Ministry of Absorption (L.I.), Edmond and Lily Safra Brain Center (L.I.,  
809 P.R.), Rosetrees and Adelis foundation and ISF grants to HB. ISF grants (1129/12 and  
810 2128/19) to R.E., NIPI grant to R.E..

811

### 812 **Author Contributions**

813 L.I, P.R., and R.E, H.B. conceived the research and designed the experiments. Z.I.  
814 performed the surgeries. L.I, P.R., G.F. performed the in vivo physiology experiments and  
815 data analysis. R.E. and O.M. performed the human physiology experiments and data  
816 analysis. L.I. and P.R. wrote the manuscript and all authors commented on and approved  
817 the writing.

818

### 819 **References**

- 820 1. Engel, A. K. & Fries, P. Beta-band oscillations-signalling the status quo? *Curr.*  
821 *Opin. Neurobiol.* **20**, 156–165 (2010).
- 822 2. Brown, P. Abnormal oscillatory synchronisation in the motor system leads to  
823 impaired movement. *Curr. Opin. Neurobiol.* **17**, 656–664 (2007).
- 824 3. Hahn, P. J. & McIntyre, C. C. Modeling shifts in the rate and pattern of  
825 subthalamopallidal network activity during deep brain stimulation. *J. Comput.*  
826 *Neurosci.* **28**, 425–441 (2010).

- 827 4. Nevado Holgado, A. J., Terry, J. R. & Bogacz, R. Conditions for the generation of  
828 beta oscillations in the subthalamic nucleus-globus pallidus network. *J. Neurosci.*  
829 **30**, 12340–12352 (2010).
- 830 5. Deffains, M. *et al.* Subthalamic, not striatal, activity correlates with basal ganglia  
831 downstream activity in normal and parkinsonian monkeys. *Elife* **5**, 1–38 (2016).
- 832 6. Raz, A., Vaadia, E. & Bergman, H. Firing Patterns and Correlations of  
833 Spontaneous Discharge of Pallidal Neurons in the Normal and the Tremulous 1-  
834 Methyl-4-Phenyl-1,2,3,6-Tetrahydropyridine Vervet Model of Parkinsonism. *J.*  
835 *Neurosci.* **20**, 8559 LP – 8571 (2000).
- 836 7. Ivica, N. *et al.* Changes in neuronal activity of cortico-basal ganglia-thalamic  
837 networks induced by acute dopaminergic manipulations in rats. *Eur. J. Neurosci.*  
838 **47**, 236–250 (2018).
- 839 8. Ray, N. J. *et al.* Local field potential beta activity in the subthalamic nucleus of  
840 patients with Parkinson’s disease is associated with improvements in bradykinesia  
841 after dopamine and deep brain stimulation. *Exp. Neurol.* **213**, 108–113 (2008).
- 842 9. Bergman, H., Wichmann, T., Karmon, B. & DeLong, M. R. The primate  
843 subthalamic nucleus. II. Neuronal activity in the MPTP model of parkinsonism. *J.*  
844 *Neurophysiol.* **72**, 507–520 (1994).
- 845 10. Mallet, N. *et al.* Disrupted dopamine transmission and the emergence of  
846 exaggerated beta oscillations in subthalamic nucleus and cerebral cortex. *J.*  
847 *Neurosci.* **28**, 4795–4806 (2008).
- 848 11. Degos, B., Deniau, J. M., Chavez, M. & Maurice, N. Chronic but not acute  
849 dopaminergic transmission interruption promotes a progressive increase in cortical  
850 beta-frequency synchronization: Relationships to vigilance state and akinesia.  
851 *Cereb. Cortex* **19**, 1616–1630 (2009).
- 852 12. Sharott, A. *et al.* Dopamine depletion increases the power and coherence of  $\beta$ -  
853 oscillations in the cerebral cortex and subthalamic nucleus of the awake rat. *Eur. J.*  
854 *Neurosci.* **21**, 1413–1422 (2005).
- 855 13. Kuhn A. Pathological synchronisation in the subthalamic nucleus of patients with  
856 Parkinson’s disease relates to both bradykinesia and rigidity.pdf. *Exp Neurol*  
857 (2009).
- 858 14. Connolly, A. T. *et al.* Modulations in Oscillatory Frequency and Coupling in  
859 Globus Pallidus with Increasing Parkinsonian Severity. *J. Neurosci.* **35**, 6231–  
860 6240 (2015).
- 861 15. Nini, A., Feingold, A., Slovlin, H. & Bergman, H. Neurons in the globus pallidus  
862 do not show correlated activity in the normal monkey, but phase-locked  
863 oscillations appear in the MPTP model of Parkinsonism. *J. Neurophysiol.* **74**,  
864 1800–1805 (1995).
- 865 16. Swann, N. C. *et al.* Chronic multisite brain recordings from a totally implantable  
866 bidirectional neural interface: experience in 5 patients with Parkinson’s disease. *J.*

- 867            *Neurosurg.* **128**, 605–616 (2018).
- 868    17.    Wang, D. D. *et al.* Pallidal deep-brain stimulation disrupts pallidal beta oscillations  
869            and coherence with primary motor cortex in Parkinson’s disease. *J. Neurosci.* **38**,  
870            4556–4568 (2018).
- 871    18.    Moshel, S. *et al.* Subthalamic nucleus long-range synchronization—an  
872            independent hallmark of human Parkinson’s disease. *Front. Syst. Neurosci.* **7**,  
873            (2013).
- 874    19.    Yu, C., Cassar, I. R., Sambangi, J. & Grill, W. M. Frequency-Specific Optogenetic  
875            Deep Brain Stimulation of Subthalamic Nucleus Improves Parkinsonian Motor  
876            Behaviors. *J. Neurosci.* **40**, 4323 LP – 4334 (2020).
- 877    20.    Martin, R. & Bowden, D. Primate Brain Maps: Structure of the Macaque Brain.  
878            *Elsevier Sci.* (2000).
- 879    21.    Best, M. D. *et al.* Comparing offline decoding performance in physiologically  
880            defined neuronal classes. *J. Neural Eng.* **13**, 26004 (2016).
- 881    22.    Fan, H., Pan, X., Wang, R. & Sakagami, M. Differences in reward processing  
882            between putative cell types in primate prefrontal cortex. *PLoS One* **12**, 1–27  
883            (2017).
- 884    23.    Litvak, V. *et al.* Resting oscillatory cortico-subthalamic connectivity in patients  
885            with Parkinson’s disease. *Brain* **134**, 359–374 (2011).
- 886    24.    Priori, A., Foffani, G., Rossi, L. & Marceglia, S. Adaptive deep brain stimulation  
887            (aDBS) controlled by local field potential oscillations. *Exp. Neurol.* **245**, 77–86  
888            (2013).
- 889    25.    Priori, A. *et al.* Rhythm-specific pharmacological modulation of subthalamic  
890            activity in Parkinson’s disease. *Exp. Neurol.* **189**, 369–379 (2004).
- 891    26.    Beck, M. H. *et al.* Short- and long-term dopamine depletion causes enhanced beta  
892            oscillations in the cortico-basal ganglia loop of parkinsonian rats. *Exp. Neurol.*  
893            **286**, 124–136 (2016).
- 894    27.    Oswal, A., Brown, P. & Litvak, V. Synchronized neural oscillations and the  
895            pathophysiology of Parkinson’s disease. *Curr. Opin. Neurol.* **26**, 662–670 (2013).
- 896    28.    Hering, R. I., Jones, R. T., Hooker, W. D., Mendelson, J. & Blackwell, L.  
897            Cocaine increases EEG beta: A replication and extension of Hans Berger’s historic  
898            experiments. *Electroencephalogr. Clin. Neurophysiol.* **60**, 470–477 (1985).
- 899    29.    Chemali J.J. Active Emergence from Propofol General Anesthesia is Induced by  
900            Methylphenidate. *Bone* **23**, 1–7 (2008).
- 901    30.    Rice, M. E. & Patel, J. C. Somatodendritic dopamine release: Recent mechanistic  
902            insights. *Philos. Trans. R. Soc. B Biol. Sci.* **370**, 1–14 (2015).
- 903    31.    Christiansen, J. & Squires, R. F. Antagonistic effects of apomorphine and  
904            haloperidol on rat striatal synaptosomal tyrosine hydroxylase. *J. Pharm.*

- 905            *Pharmacol.* **26**, 367–369 (1974).
- 906    32.    Farnebo, L. O & Hamberger, B. Drug-Induced Changes in the Release of 3H-  
907            Monoamines from Field Stimulated Rat Brain Slices. *Acta Physiol. Scand.* **84**, 35–  
908            44 (1971).
- 909    33.    Iversen, L. L., Rogawski, M. A. & Miller, R. J. Comparison of the effects of  
910            neuroleptic drugs on pre- and postsynaptic dopaminergic mechanisms in the rat  
911            striatum. *Mol. Pharmacol.* **12**, 251–262 (1976).
- 912    34.    Stoffers, D. *et al.* Slowing of oscillatory brain activity is a stable characteristic of  
913            Parkinson’s disease without dementia. *Brain* **130**, 1847–1860 (2007).
- 914    35.    Connolly, A. T., Jensen, A. L., Baker, K. B., Vitek, J. L. & Johnson, M. D.  
915            Classification of pallidal oscillations with increasing parkinsonian severity. *J.*  
916            *Neurophysiol.* **114**, 209–218 (2015).
- 917    36.    Wang, J. *et al.* Network-wide oscillations in the parkinsonian state: Alterations in  
918            neuronal activities occur in the premotor cortex in parkinsonian nonhuman  
919            primates. *J. Neurophysiol.* **117**, 2242–2249 (2017).
- 920    37.    Abosch, A. *et al.* Long-term recordings of local field potentials from implanted  
921            deep brain stimulation electrodes. *Neurosurgery* **71**, 804–814 (2012).
- 922    38.    Avila, I. *et al.* Beta-frequency synchronization in basal ganglia output during rest  
923            and walk in a hemiparkinsonian rat. *Exp. Neurol.* **221**, 307–319 (2010).
- 924    39.    Torrecillos, F. *et al.* Motor Cortex Inputs at the Optimum Phase of Beta Cortical  
925            Oscillations Undergo More Rapid and Less Variable Corticospinal Propagation. *J.*  
926            *Neurosci.* **40**, 369 LP – 381 (2020).
- 927    40.    Schilberg, L. *et al.* Phase of beta-frequency tACS over primary motor cortex  
928            modulates corticospinal excitability. *Cortex* **103**, 142–152 (2018).
- 929    41.    Rappel, P. *et al.* Subthalamic theta activity: A novel human subcortical biomarker  
930            for obsessive compulsive disorder. *Transl. Psychiatry* **8**, (2018).
- 931    42.    Deffains, M., Iskhakova, L., Katabi, S., Israel, Z. & Bergman, H. Longer  $\beta$   
932            oscillatory episodes reliably identify pathological subthalamic activity in  
933            Parkinsonism. *Mov. Disord.* **33**, 1609–1618 (2018).
- 934    43.    Joshua, M., Elias, S., Levine, O. & Bergman, H. Quantifying the isolation quality  
935            of extracellularly recorded action potentials. *J. Neurosci. Methods* **163**, 267–282  
936            (2007).
- 937    44.    DeLong, M. R. Activity of pallidal neurons during movement. *J. Neurophysiol.* **34**,  
938            414–427 (1971).
- 939    45.    Kao, C., Best, M. D., Takahashi, K. & Suminski, A. J. Comparing offline decoding  
940            performance in physiologically defined neuronal classes. (2016).
- 941    46.    Lachaux, J.-P., Rodriguez, E., Martinerie, J. & Varela, F. J. Measuring phase  
942            synchrony in brain signals. *Hum. Brain Mapp.* **8**, 194–208 (1999).

- 943 47. Srinath, R. & Ray, S. Effect of amplitude correlations on coherence in the local  
944 field potential. *J. Neurophysiol.* **112**, 741–751 (2014).
- 945 48. Tomlinson, C. L. *et al.* Systematic review of levodopa dose equivalency reporting  
946 in Parkinson’s disease. *Mov. Disord.* **25**, 2649–2653 (2010).
- 947 49. Zaidel, A., Moran, A., Marjan, G., Bergman, H. & Israel, Z. Prior pallidotomy  
948 reduces and modifies neuronal activity in the subthalamic nucleus of Parkinson’s  
949 disease patients. *Eur. J. Neurosci.* **27**, 483–491 (2008).
- 950 50. Marmor, O. *et al.* Local vs. volume conductance activity of field potentials in the  
951 human subthalamic nucleus. *J. Neurophysiol.* **117**, 2140–2151 (2017).

952  
953  
954  
955  
956  
957  
958  
959  
960  
961  
962  
963  
964  
965  
966  
967  
968  
969  
970  
971  
972  
973  
974  
975

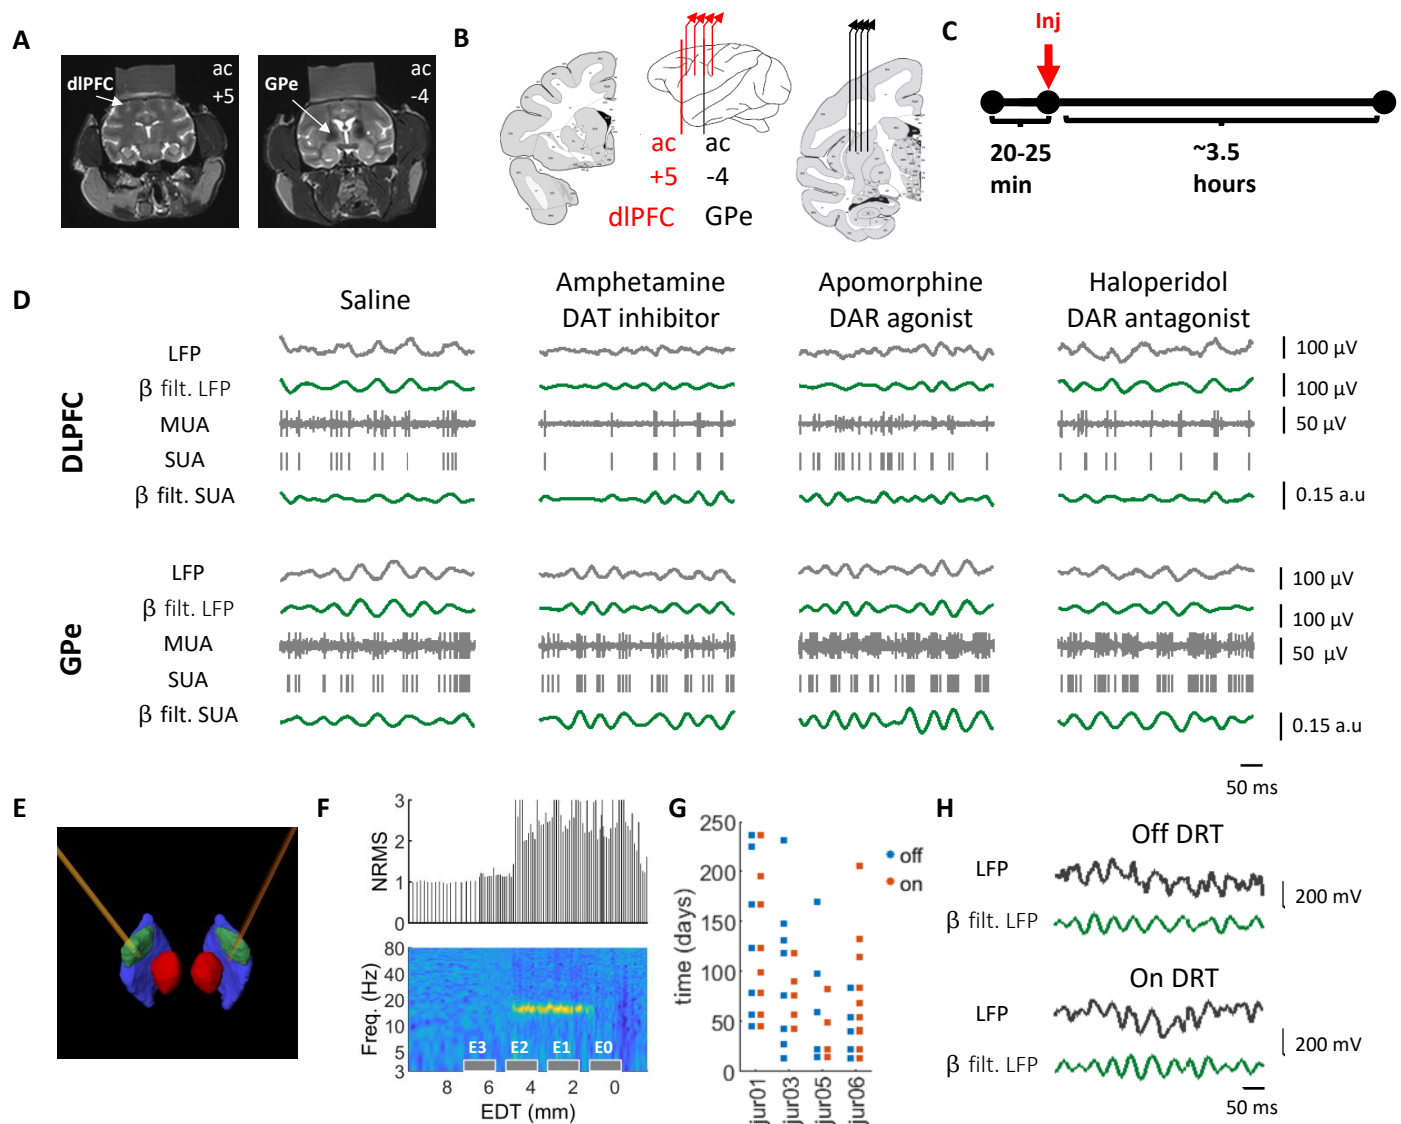

976 **Figure 1: Experiment design.** (A) MRI of monkey G. Coronal images showing recording  
 977 targets. (B) A scheme of ac+5 and ac-4 coronal planes with four electrodes in each  
 978 recording target. Middle: coronal plane positions marked on an atlas scheme. Adapted from  
 979 Martin and Bowden<sup>20</sup>. (C) Daily timeline scheme with pre- and post-injection times. (D)  
 980 500 ms traces from the dIPFC and GPe under each drug condition. LFP: local field  
 981 potential, MUA: multiunit activity, SUA: single unit activity (cortical narrow units and  
 982 pallidal units),  $\beta$  filt: beta (8-24Hz) bandpass filtered. (E) Electrode position marked on  
 983 reconstruction of one patient atlas, based on the postop CT with the pre-op MRI. Green:  
 984 STN, red: red nucleus, blue: substantia nigra pars reticulata. (F) Electrode contact position  
 985 relative to STN electrophysiological activity of the same patient as in (E). x axis indicates  
 986 estimated distance from clinical target (EDT). The target was set preoperatively to the  
 987 estimated ventro-lateral border of the STN. Top: MUA total power evaluated as normalized  
 988 root mean square (NRMS). NRMS elevation and decline indicate STN entry and exit,  
 989 respectively. Bottom: LFP normalized power spectral density (nPSD, percentage of total



990 power, filtered with gaussian window for presentation purposes). Contact positions marked  
991 as grey boxes. The STN dorsal motor area can be identified according to its pronounced  
992 beta activity. (G) Recording schedule of PD patients included in this study. (H) 500ms  
993 traces from the STN of PD patient (same patient as in E-F) on and off DRT. DAT –  
994 dopamine transporter, DAR – dopamine receptor.

995

996

997

998

999

1000

1001

1002

1003

1004

1005

1006

1007

1008

1009

1010

1011

1012

1013

1014

1015

1016

1017

1018

1019

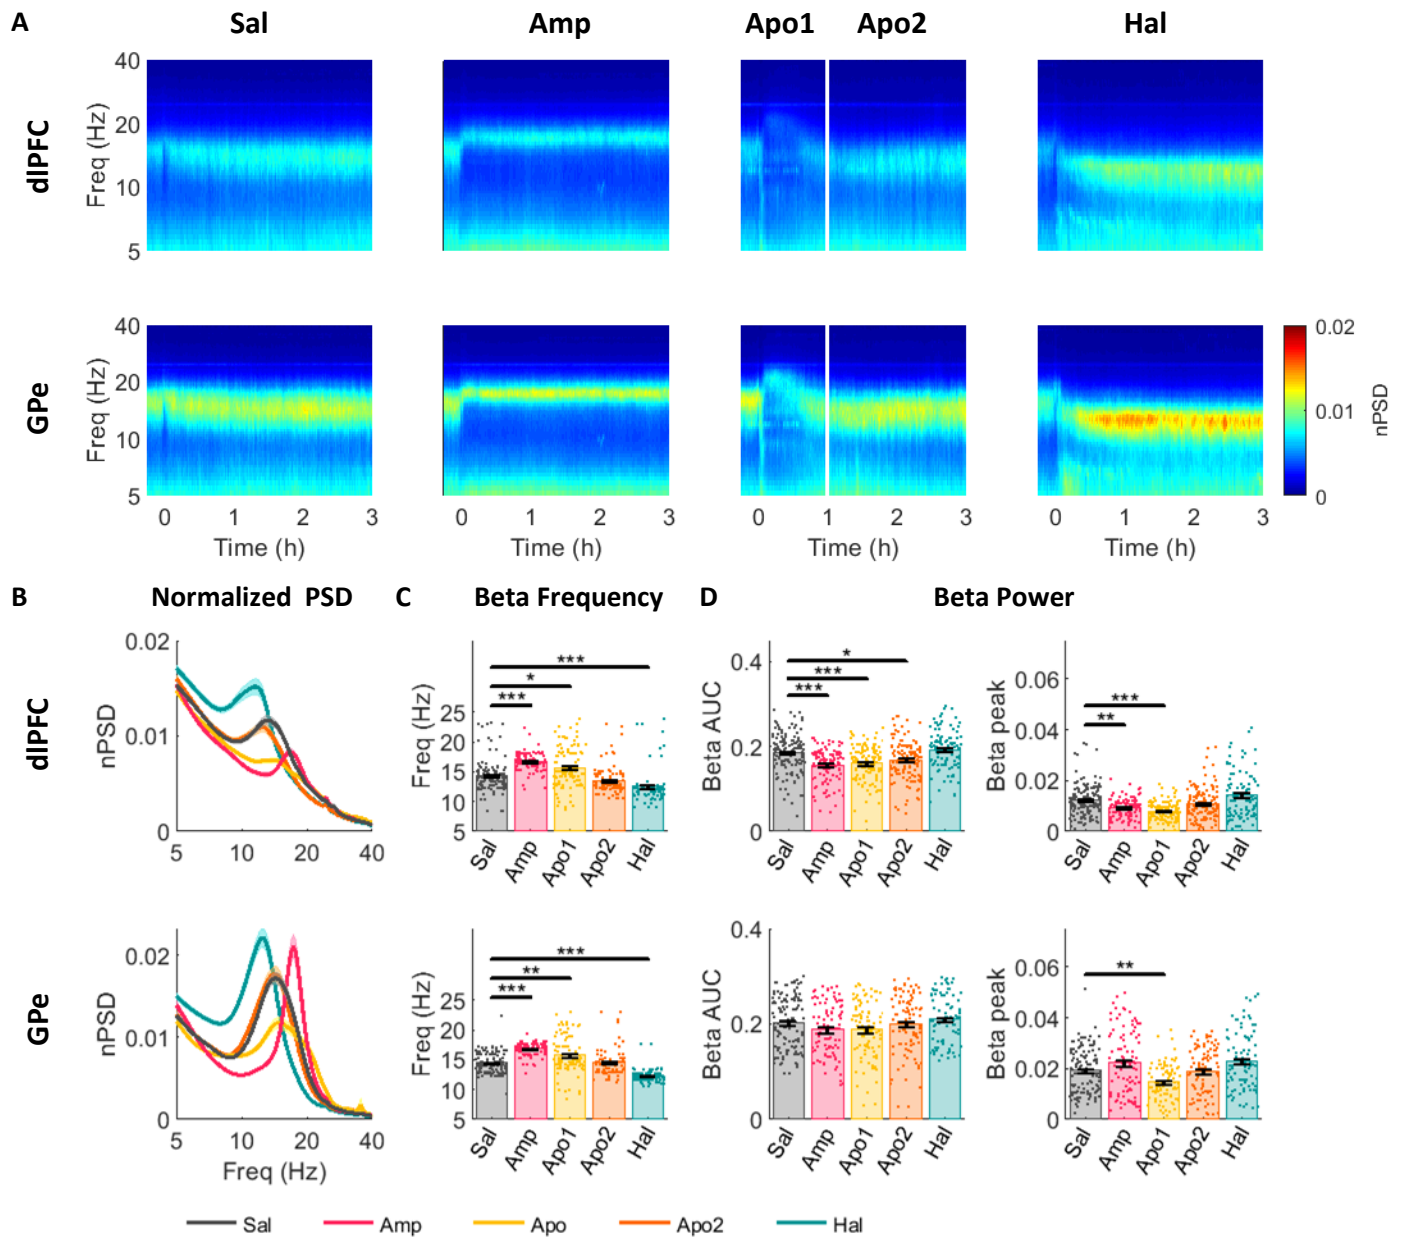

1020 **Fig 2. Acute up- and down-modulation of dopamine tone up- and down-shifts LFP**  
 1021 **beta frequency in the dIPFC and GPe of NHP.** (A) Average spectrogram of dIPFC (top)  
 1022 and GPe (bottom) LFP. Time 0 on the x-axis indicates injection time. Color scale indicates  
 1023 nPSD. White line in the third column divides the post-apomorphine period into Apo1 -  
 1024 agonistic phase and Apo2 – post-agonistic phase. (B-D) LFP beta properties in dIPFC (top)  
 1025 and GPe (bottom) under each drug condition. (B) Average nPSD. (C) Frequency of beta  
 1026 peaks in oscillatory LFP sites (see methods). (D) Beta power evaluated as area under curve  
 1027 (AUC) of the nPSD in 8-24Hz range (left), or as nPSD beta peak within 8-24 Hz frequency  
 1028 band (right). Bars indicate average values. Single points indicate individual LFP site  
 1029 values. Black vertical lines indicate standard error of the mean. Drug influence was  
 1030 evaluated by Kruskal-Wallis test followed by post-hoc pairwise comparisons. Comparisons

1031 between saline and drug treatments are presented in current figure. Full post-hoc results  
1032 can be found in Table S3. \*  $p < 0.05$  \*\*  $p < 0.01$  \*\*\*  $p < 0.001$

1033

1034

1035

1036

1037

1038

1039

1040

1041

1042

1043

1044

1045

1046

1047

1048

1049

1050

1051

1052

1053

1054

1055

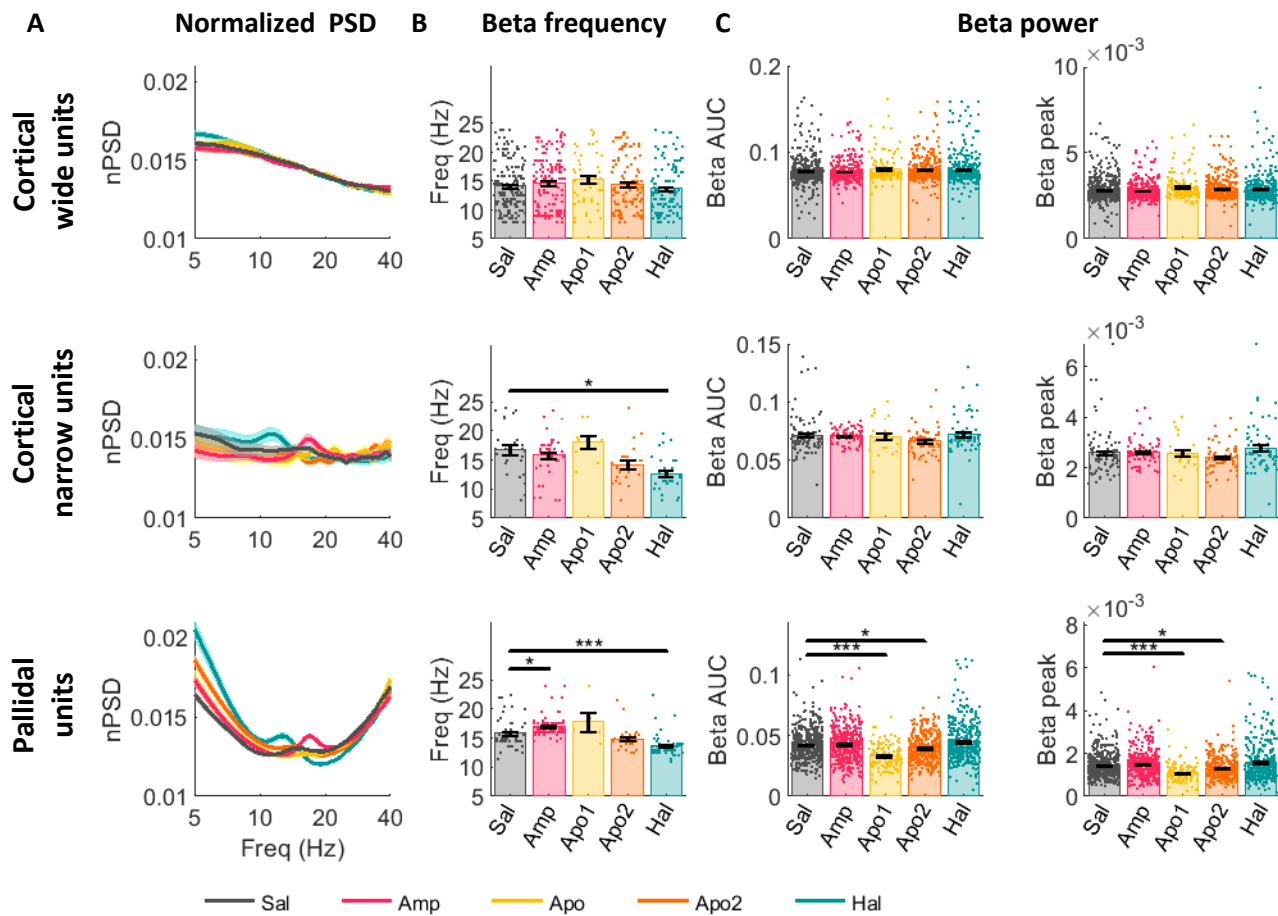

1056 **Fig 3. Acute up- and down-modulation of dopamine tone up- and down-shifts SUA**  
 1057 **beta frequency in the cortical narrow and pallidal units of NHP.** Single unit beta  
 1058 properties in cortical wide (top), narrow (middle) and pallidal (bottom) units under each  
 1059 drug condition. (A) Average nPSD. (B) Frequency of beta peaks in oscillatory units (see  
 1060 methods). (C) Beta power evaluated as area under curve (AUC) of the nPSD in 8-24 Hz  
 1061 range (left), or as nPSD beta peak within 8-24 Hz frequency band. Bars indicate average  
 1062 values. Single points indicate individual unit values. Black vertical lines indicate standard  
 1063 error of the mean. Drug influence was evaluated by Kruskal-Wallis test followed by post-  
 1064 hoc pairwise comparisons. Comparisons between saline and drug treatments are presented  
 1065 in current figure. Full post-hoc results can be found in Table S5. \*  $p < 0.05$  \*\*  $p < 0.01$  \*\*\*  
 1066  $p < 0.001$

1067

1068

1069

1070

1071



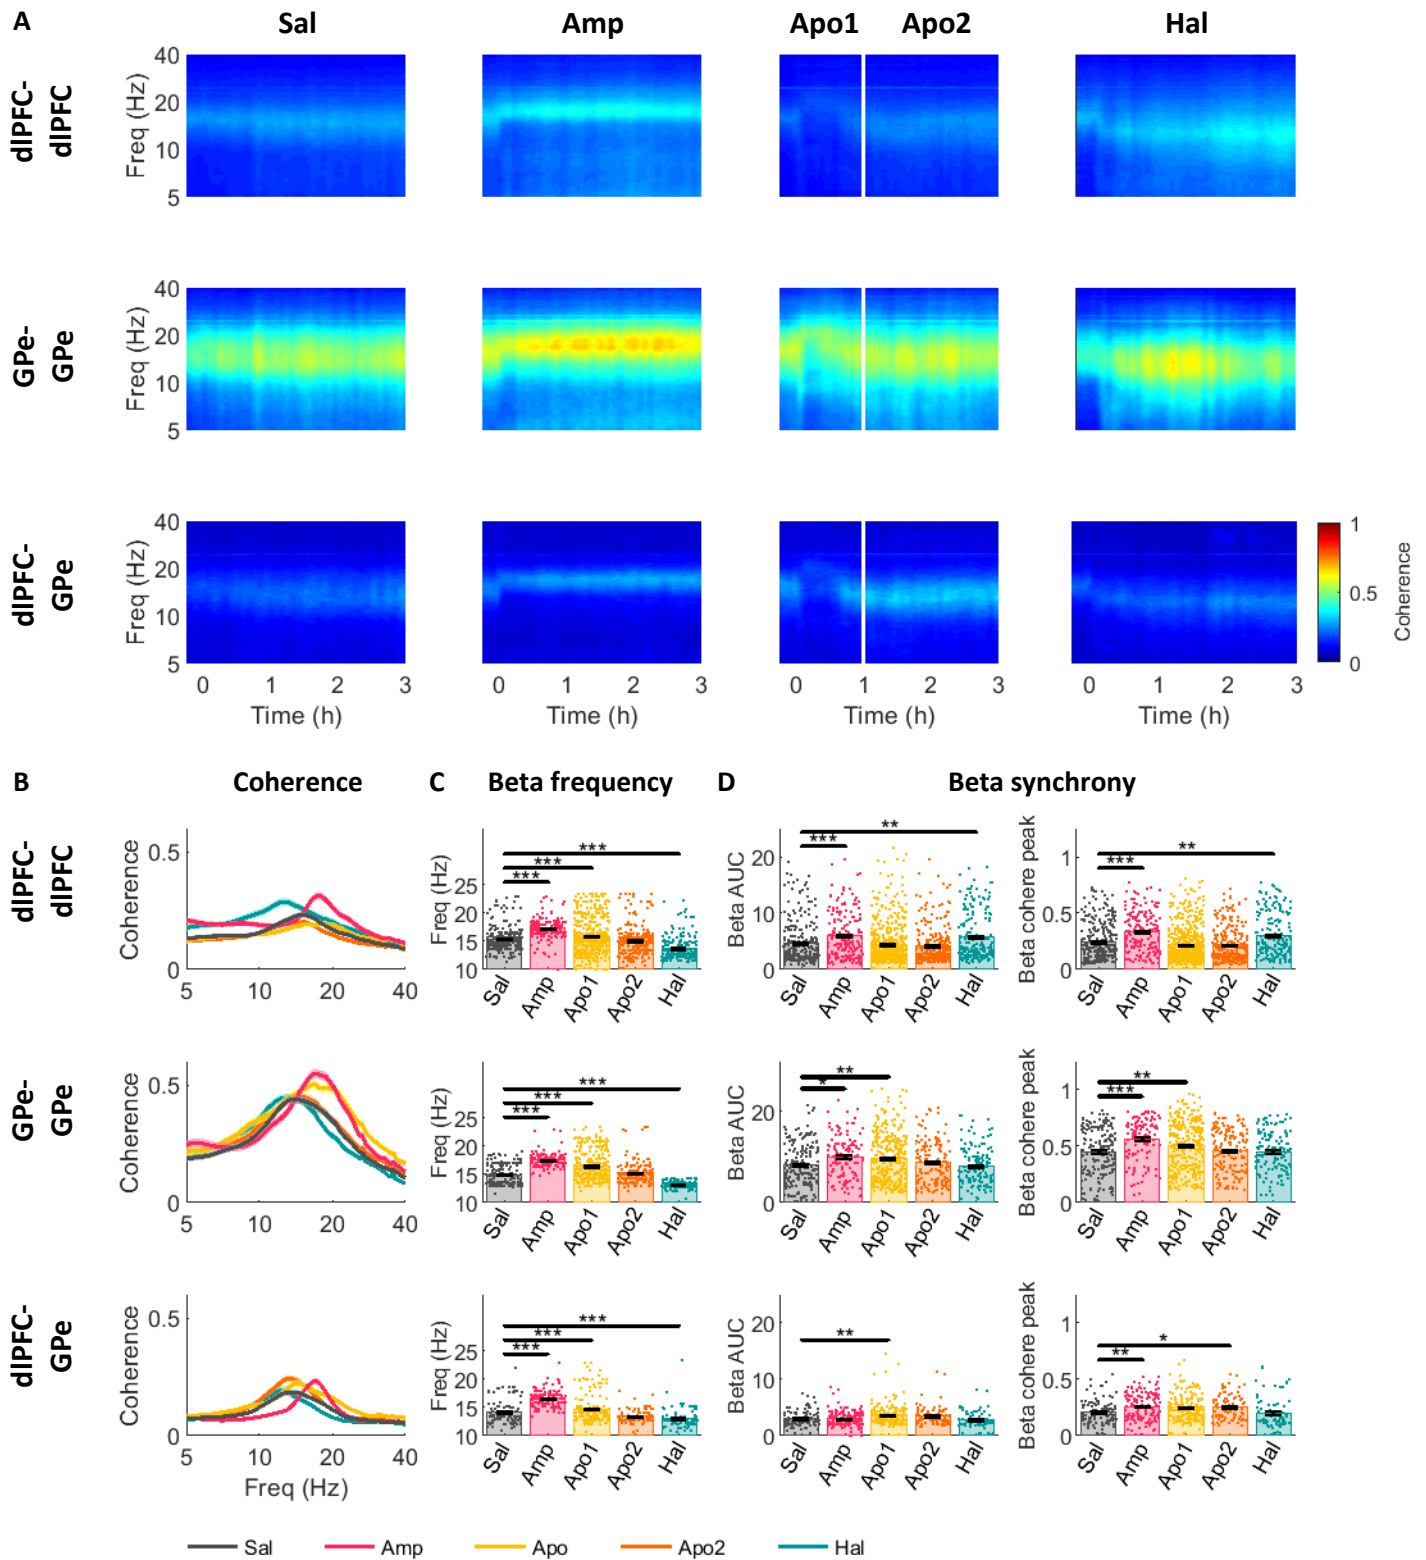

1074 **Fig 4. Acute up- and down-modulation of dopamine tone up- and down-shifts LFP**  
1075 **beta coherence frequency in the CBG network of NHP.** (A) Average coherogram of  
1076 dIPFC-dIPFC (top), GPe-GPe (middle) and dIPFC-GPe (bottom) LFP pairs. Time 0 on x-  
1077 axis indicates injection time. Color scale indicates coherence. White line in the third  
1078 column divides the post-apomorphine period into Apo1 - agonistic phase and Apo2 – post-  
1079 agonistic phase. (B-D) LFP beta coherence properties in dIPFC-dIPFC (top), GPe-GPe  
1080 (middle) and dIPFC-GPe (bottom) LFP pairs under each drug condition. (B) Average  
1081 coherence. (C) Frequency of beta coherence peaks in synchronized LFP sites (see  
1082 methods). (D) Beta synchrony evaluated as area under the curve (AUC) of coherence in 8-  
1083 24Hz range (left), and as coherence peak within 8-24Hz frequency band. Bars indicate  
1084 average values. Single points indicate individual LFP pair values. Black vertical lines  
1085 indicate standard error of the mean. Drug influence was evaluated by Kruskal-Wallis test  
1086 followed by post-hoc pairwise comparisons. Comparisons between saline and drug  
1087 treatments are presented in current figure. Full post-hoc results can be found in Table S6.  
1088 \*  $p < 0.05$  \*\*  $p < 0.01$  \*\*\*  $p < 0.001$

1089

1090

1091

1092

1093

1094

1095

1096

1097

1098

1099

1100

1101

1102

1103

1104

1105

1106

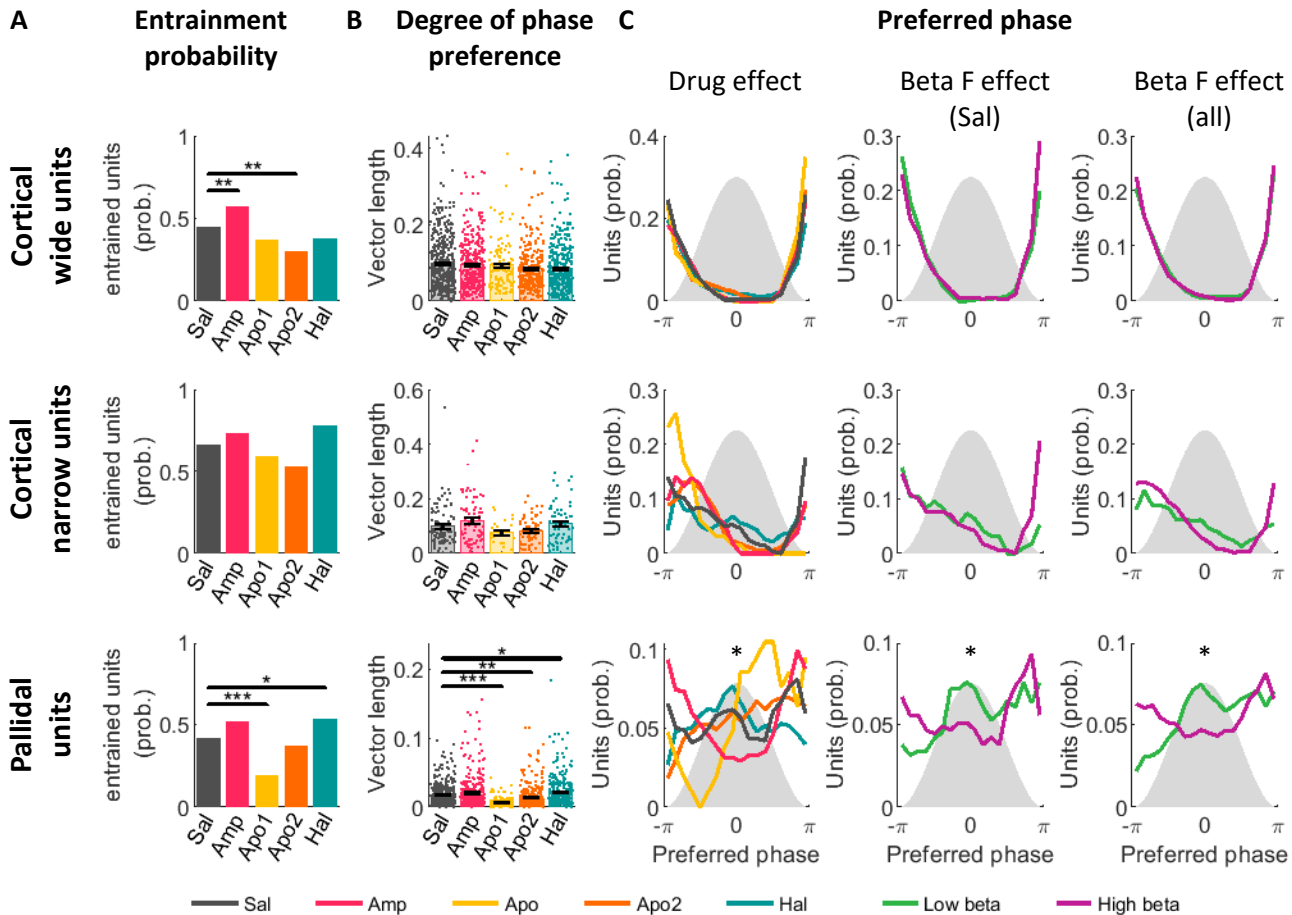

1107 **Fig 5. Drug-induced LFP beta frequency affects preferred phase of entrained units.**  
 1108 Properties of unit-LFP entrainment in the beta range frequency band of cortical wide (top),  
 1109 narrow (middle) and pallidal (bottom) units under each drug condition. (A) Probability of  
 1110 entrained units. (B) Degree of phase preference was assessed per unit by the vector length  
 1111 of the spike phase circular average. Bars indicate average values. Single points indicate  
 1112 individual unit values. Black vertical lines indicate standard error of the mean. Drug  
 1113 influence was evaluated by Kruskal-Wallis test followed by post-hoc pairwise  
 1114 comparisons. Comparisons between saline and drug treatments are presented in current  
 1115 figure. Full post-hoc results can be found in Table S7. (C) Preferred phase of entrained  
 1116 units. Gray shadow represents LFP beta cycle and x-axis indicates LFP beta phase. Y-axis  
 1117 indicates unit probability to lock to a given phase. Drug influence was evaluated by circular  
 1118 median test followed by post-hoc comparisons when needed. Left: units are grouped by  
 1119 drug condition. Middle: Only saline units, grouped by the unit beta frequency. Right: units  
 1120 from all drug conditions, grouped by the unit beta frequency. In middle and right columns,  
 1121 units were segregated into low-beta and high-beta groups according to the unit beta  
 1122 frequency using a 15Hz cutoff. \*  $p < 0.05$  \*\*  $p < 0.01$  \*\*\*  $p < 0.001$

1123

1124



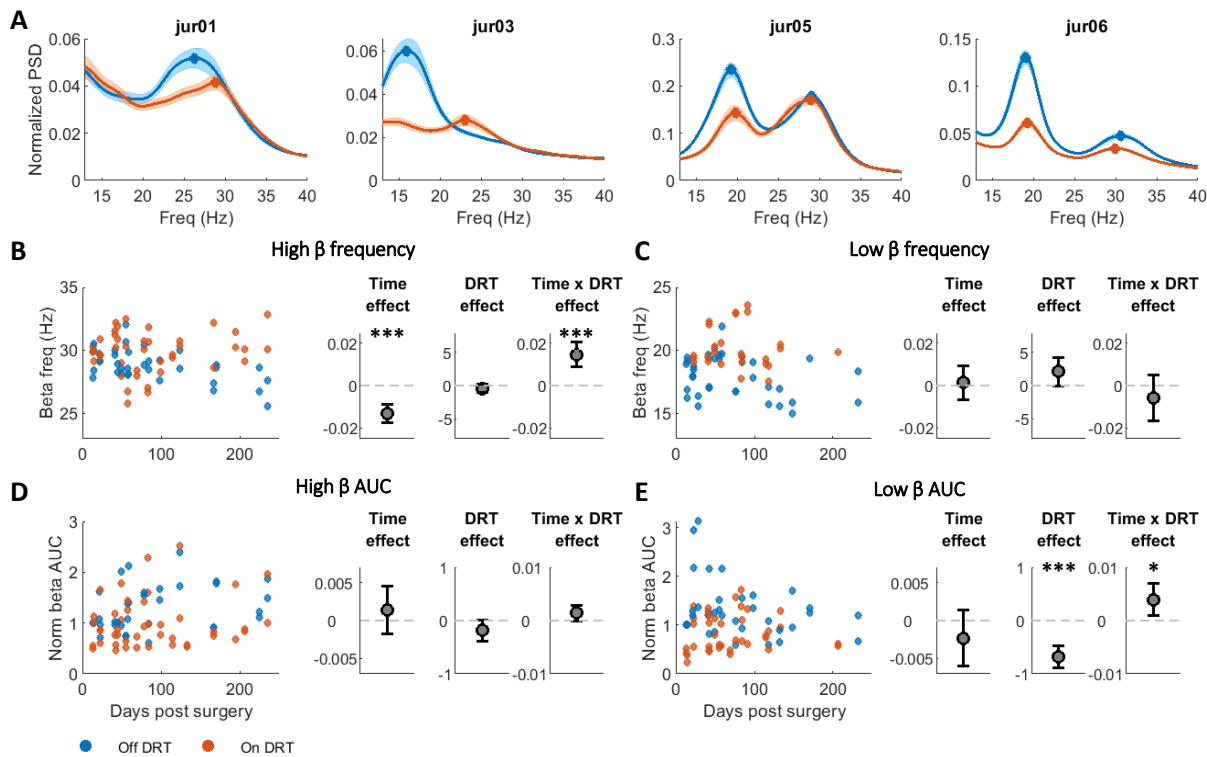

1125

1126 **Fig 6. Dopamine modulation shifts LFP beta frequency in human PD patients.** (A)  
 1127 Average nPSD off (blue) and on (red) DRT in each patient. (B-C) Time and DRT effects  
 1128 on beta frequency in the high (B) and low (C) beta domains. (Left) Frequency of beta peak  
 1129 in the high/low beta domains as a function of time post-surgery. Each point represents  
 1130 average per day of beta peak frequency in one STN on (red) and off (blue) DRT conditions.  
 1131 (Right) Time, DRT, and interaction effects on beta frequency estimated by a mixed linear  
 1132 effect model (MLEM). Gray points indicate each factor's coefficient in the MLEM.  
 1133 Positive and negative coefficients indicate positive and negative linear relation,  
 1134 respectively. In the interaction effect, the coefficient presented is of time given on DRT  
 1135 condition. Whiskers indicate the confidence interval. The significance of the fixed effects  
 1136 was estimated with ANOVA test (Table S8). (D-E) Time and DRT effects on beta power  
 1137 in the high (D) and low (E) beta domains. Plot conventions same as (B-C). Beta power  
 1138 evaluated as baseline-corrected area under the curve (AUC) of normalized PSD (nPSD) in  
 1139 the high (D) and low (E) beta domains.

1140

1141

1142

1143

1144

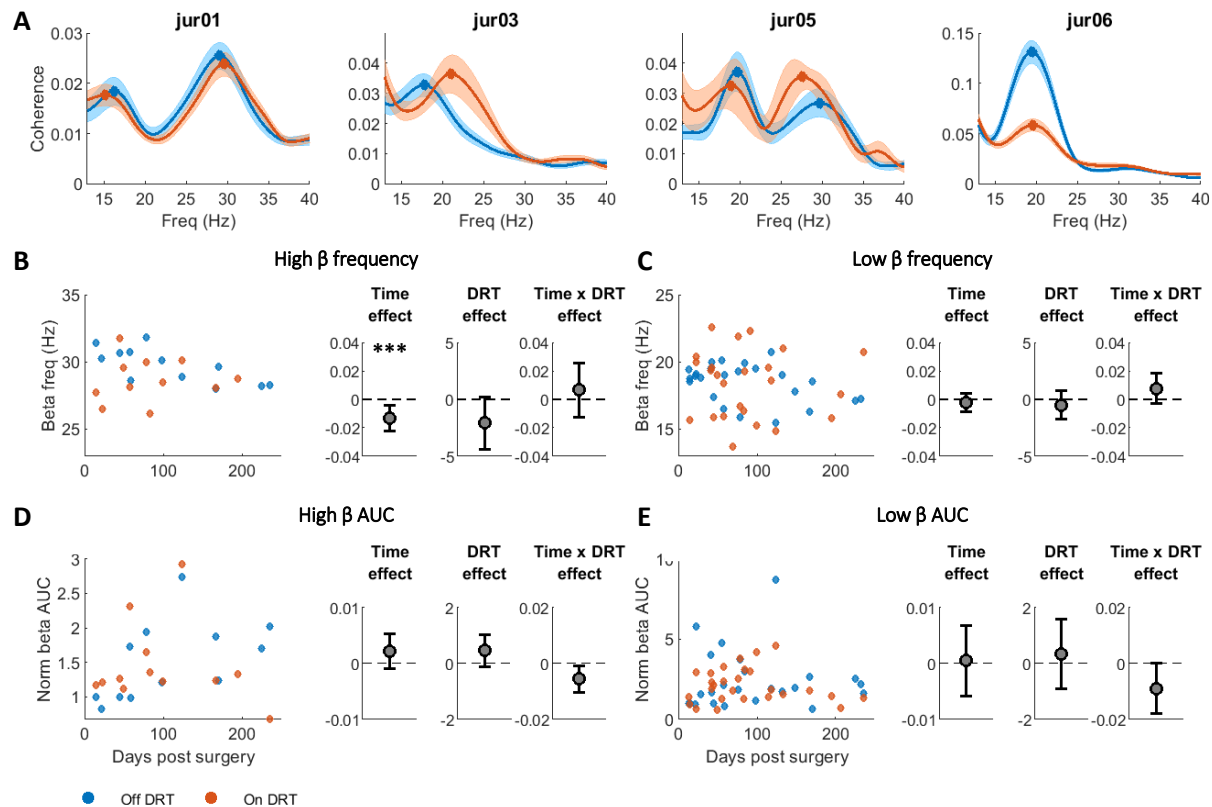

1145

1146 **Fig 7. Dopamine modulation shifts LFP coherence beta frequency in human PD**  
 1147 **patients.** (A) Average coherence off (blue) and on (red) DRT in each patient. (B-C) Time  
 1148 and DRT effects on beta coherence frequency in the high (B) and low (C) beta domains.  
 1149 (Left) Frequency of beta coherence peak in the high/low beta domains as a function of time  
 1150 post-surgery. Each point represents average per day of beta coherence peak frequency on  
 1151 (red) and off (blue) DRT conditions. (Right) Time, DRT, and interaction effects on beta  
 1152 coherence peak frequency estimated by a mixed linear effect model (MLEM). Gray points  
 1153 indicate each factor's coefficient in the model. Positive and negative coefficients indicate  
 1154 positive and negative linear relation, respectively. In the interaction effect, the coefficient  
 1155 presented is of time given on DRT condition. Whiskers indicate the confidence interval.  
 1156 Significance of the fixed effects was estimated with ANOVA test (Table S8). (D-E) Time  
 1157 and DRT effects on beta synchrony in the high (D) and low (E) beta domains. Plot  
 1158 conventions same as (B-C). Beta synchrony is evaluated as baseline-corrected area under  
 1159 the curve (AUC) of the coherence in the high (D) and low (E) beta domains.

1160

1161

1162

1163

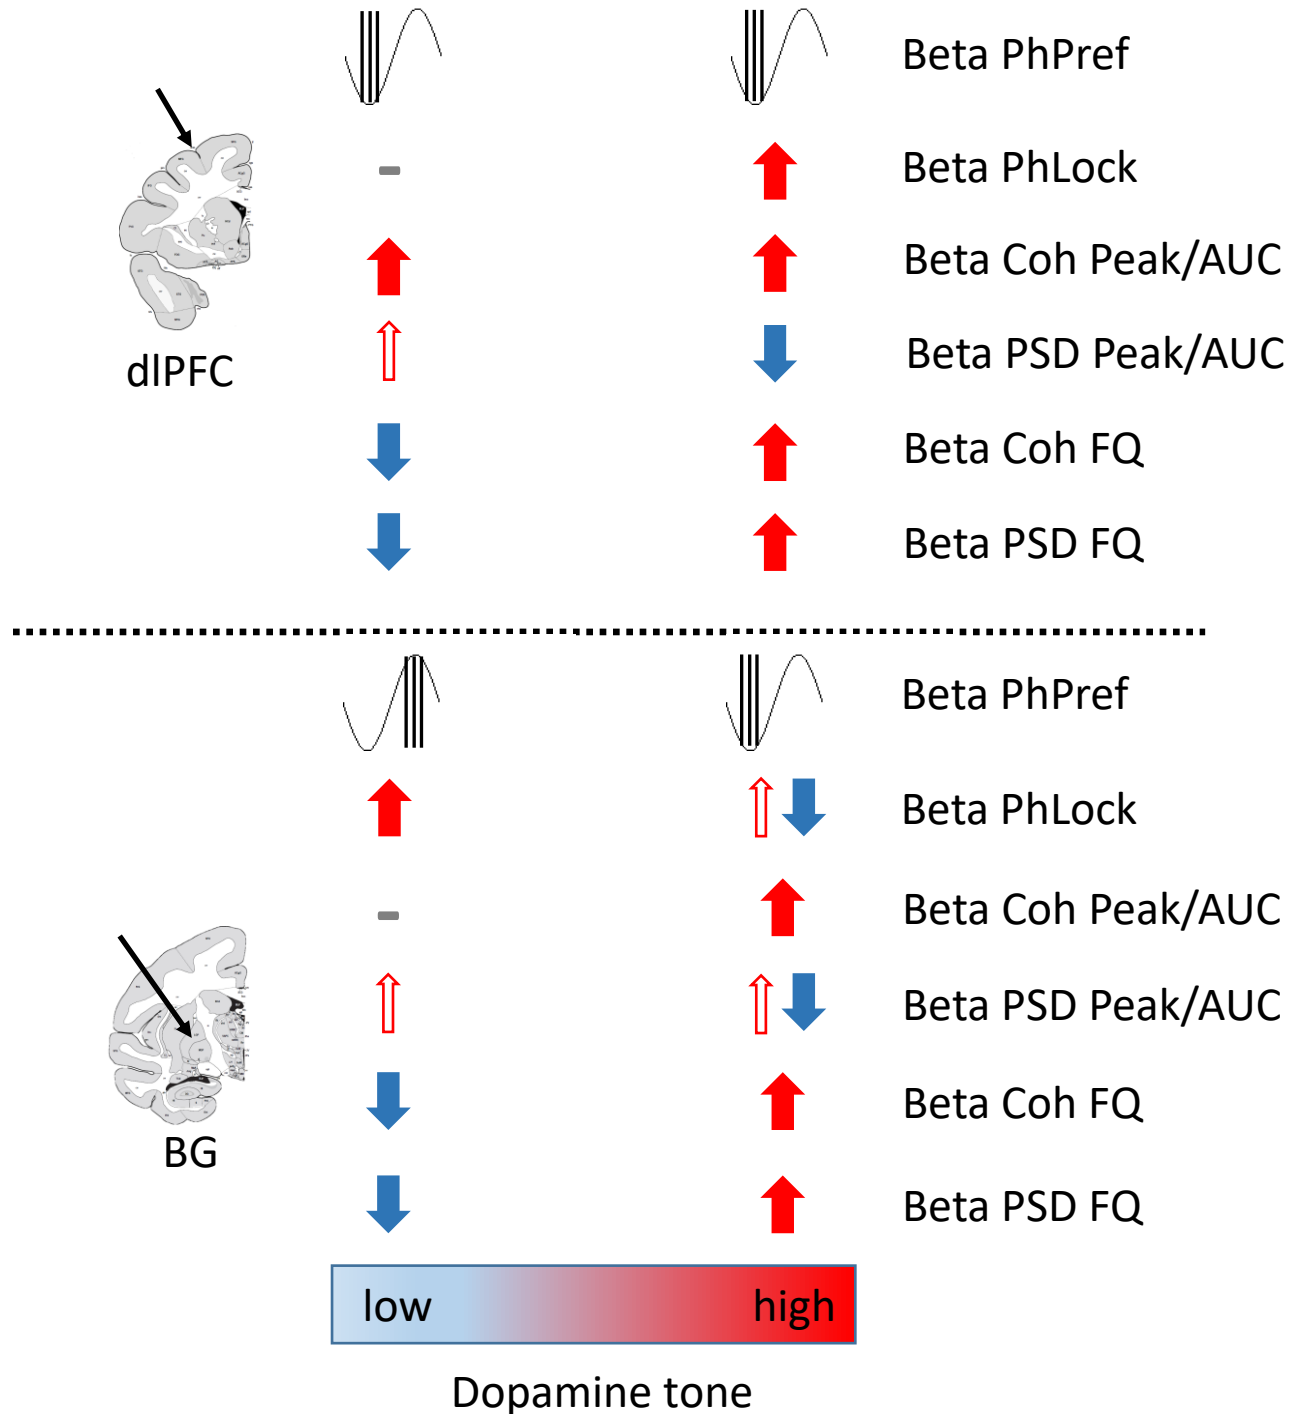

1164 **Figure 8: Results Summary.** Synopsis of LFP and SUA results. Thick arrows indicate  
 1165 statistically significant effects. Thin arrows indicate trends that did not reach statistical  
 1166 significance. Beta PhPref: spikes preferred phase in LFP beta cycle; Beta PhLock: spike to  
 1167 beta LFP phase locking; Beta Coh Peak/AUC: beta synchrony, measured as coherence beta  
 1168 peak/AUC; Beta PSD Peak/AUC: power of beta oscillation, measured as nPSD beta  
 1169 peak/AUC; Beta Coh FQ: frequency of beta coherence; Beta PSD FQ: frequency of beta

1170 oscillation. In the BG Beta PSD Peak/AUC sections thin red lines represent trends that  
1171 were significant for the top 20% of all units.
